# Supplementary material for: Synthesis and characterization of coumarin-based europium complexes and luminescence measurements in aqueous media
Source: Royal Society of Chemistry journal article supplement (doi:10.1039/b907579h), 2009-01-01

# **Synthesis and characterization of coumarin-based europium complexes and luminescence measurements in aqueous media**

**Clémentine Féau,<sup>1</sup> Emmanuel Klein,<sup>1</sup> Carsten Dosche,<sup>2</sup> Paul Kerth,<sup>3</sup> Luc Lebeau<sup>1\*</sup>**

## **Supplementary information**

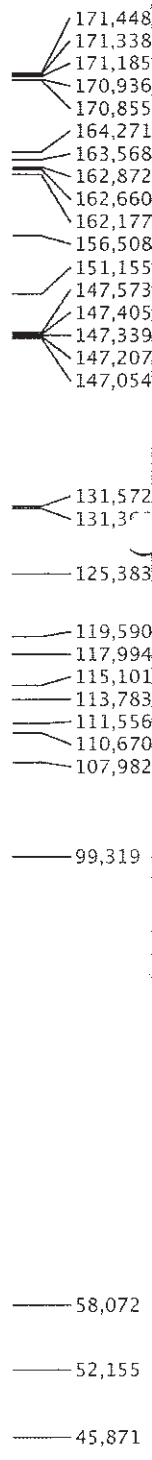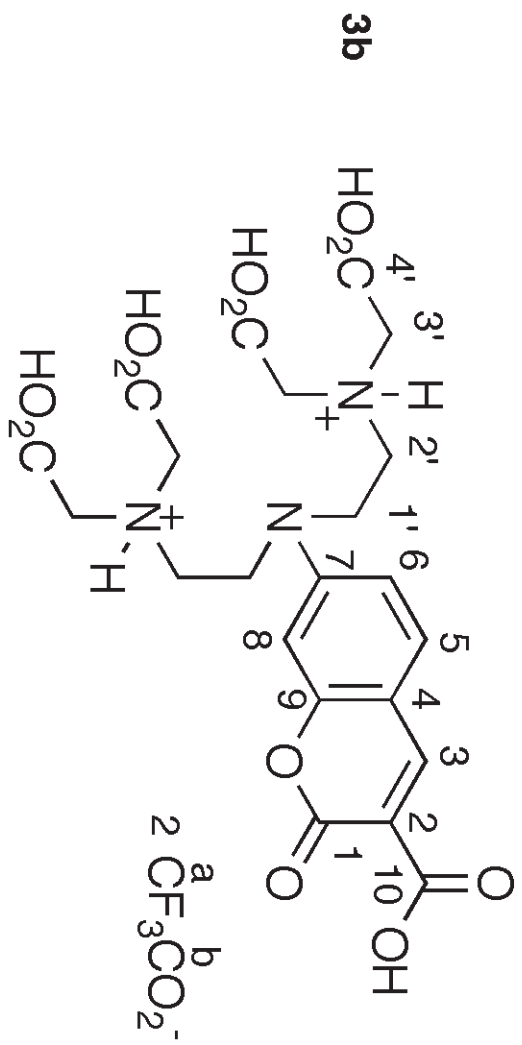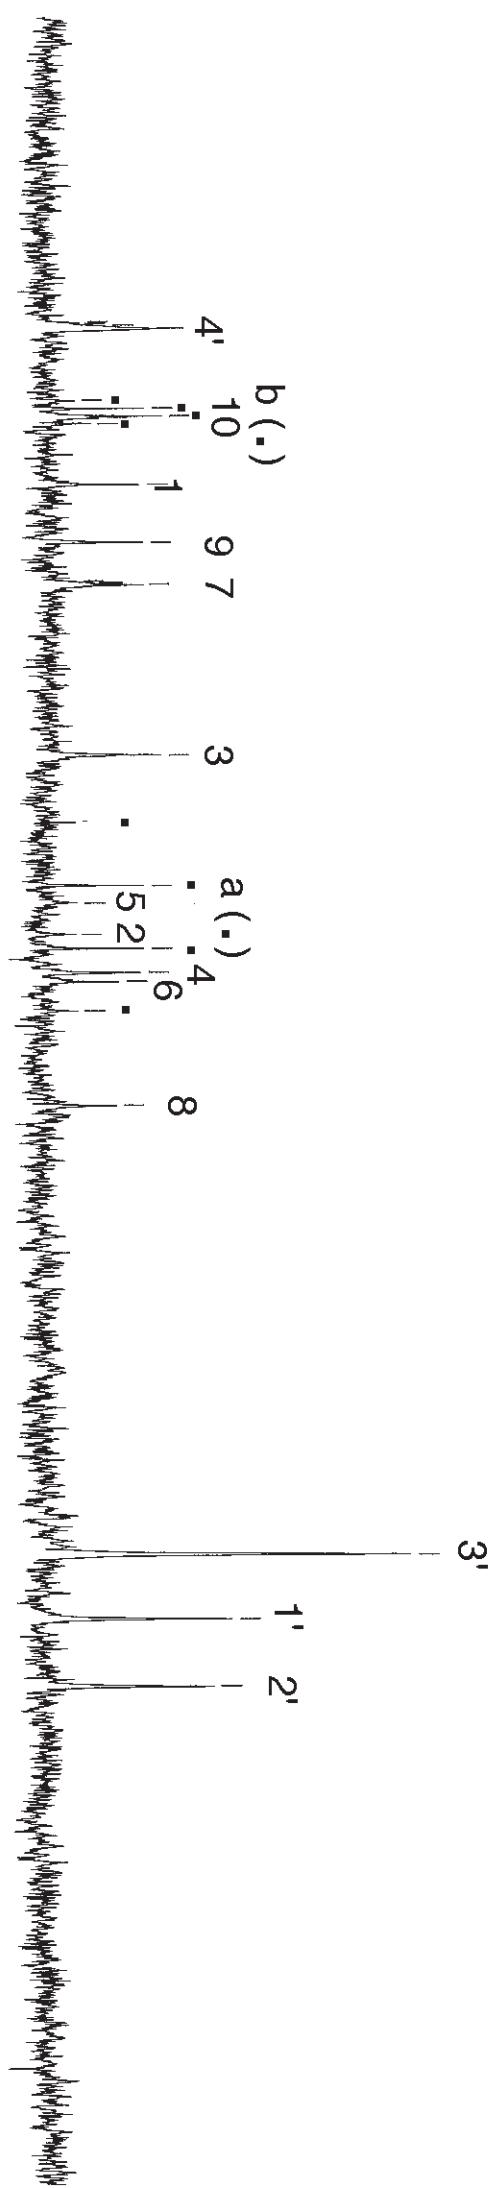

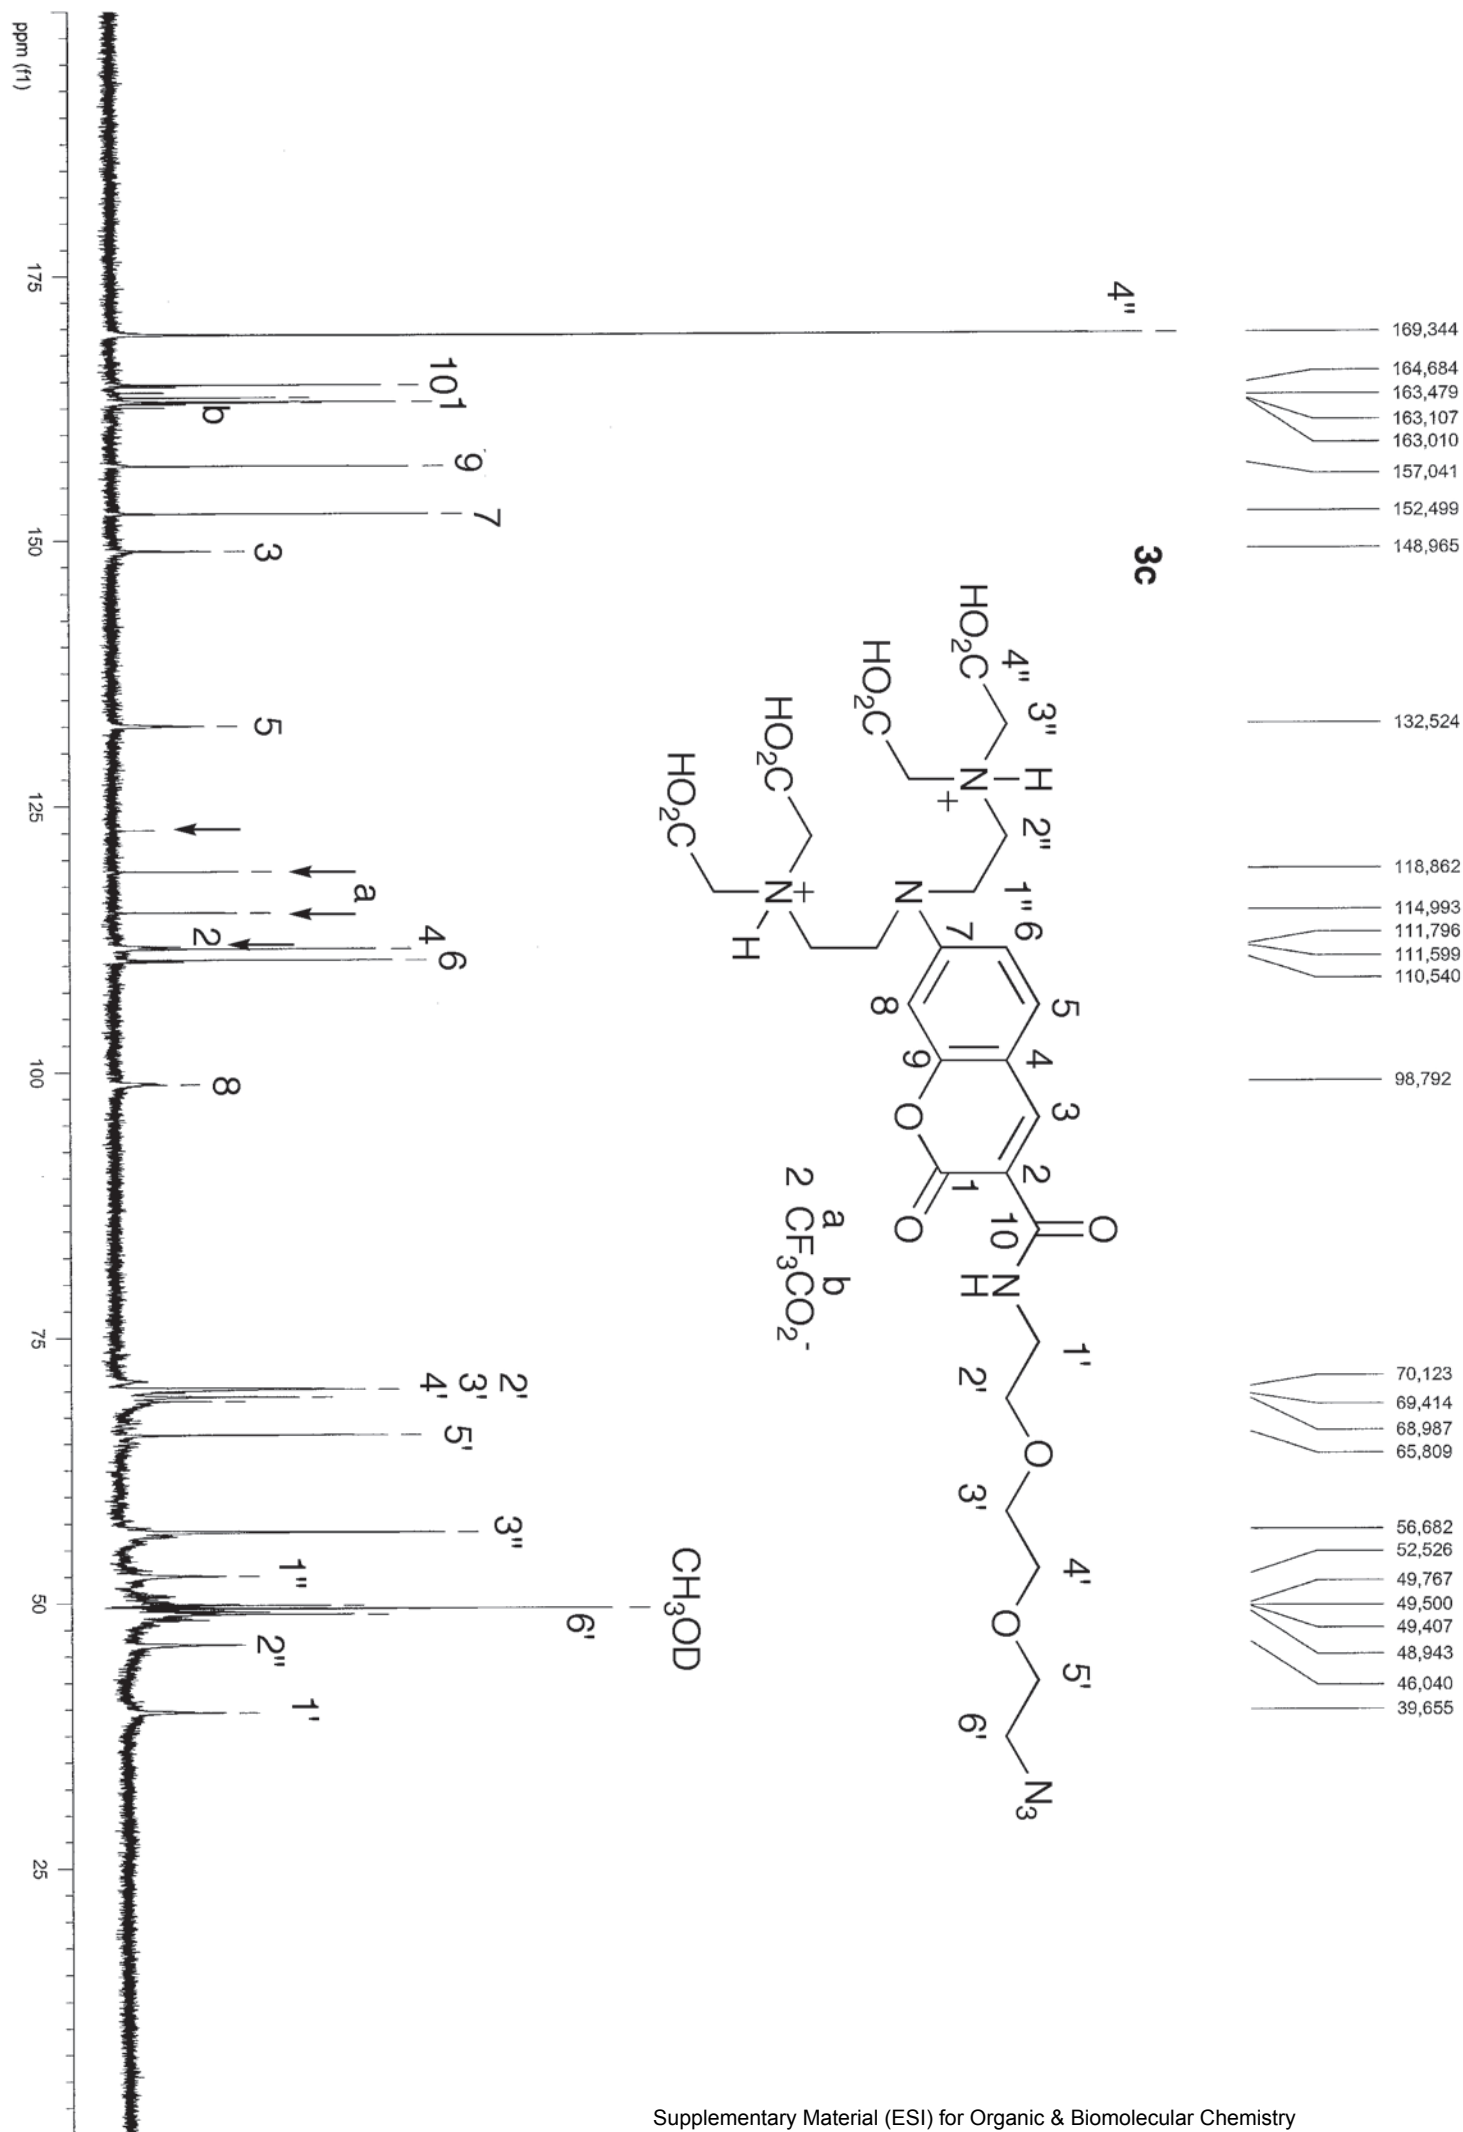



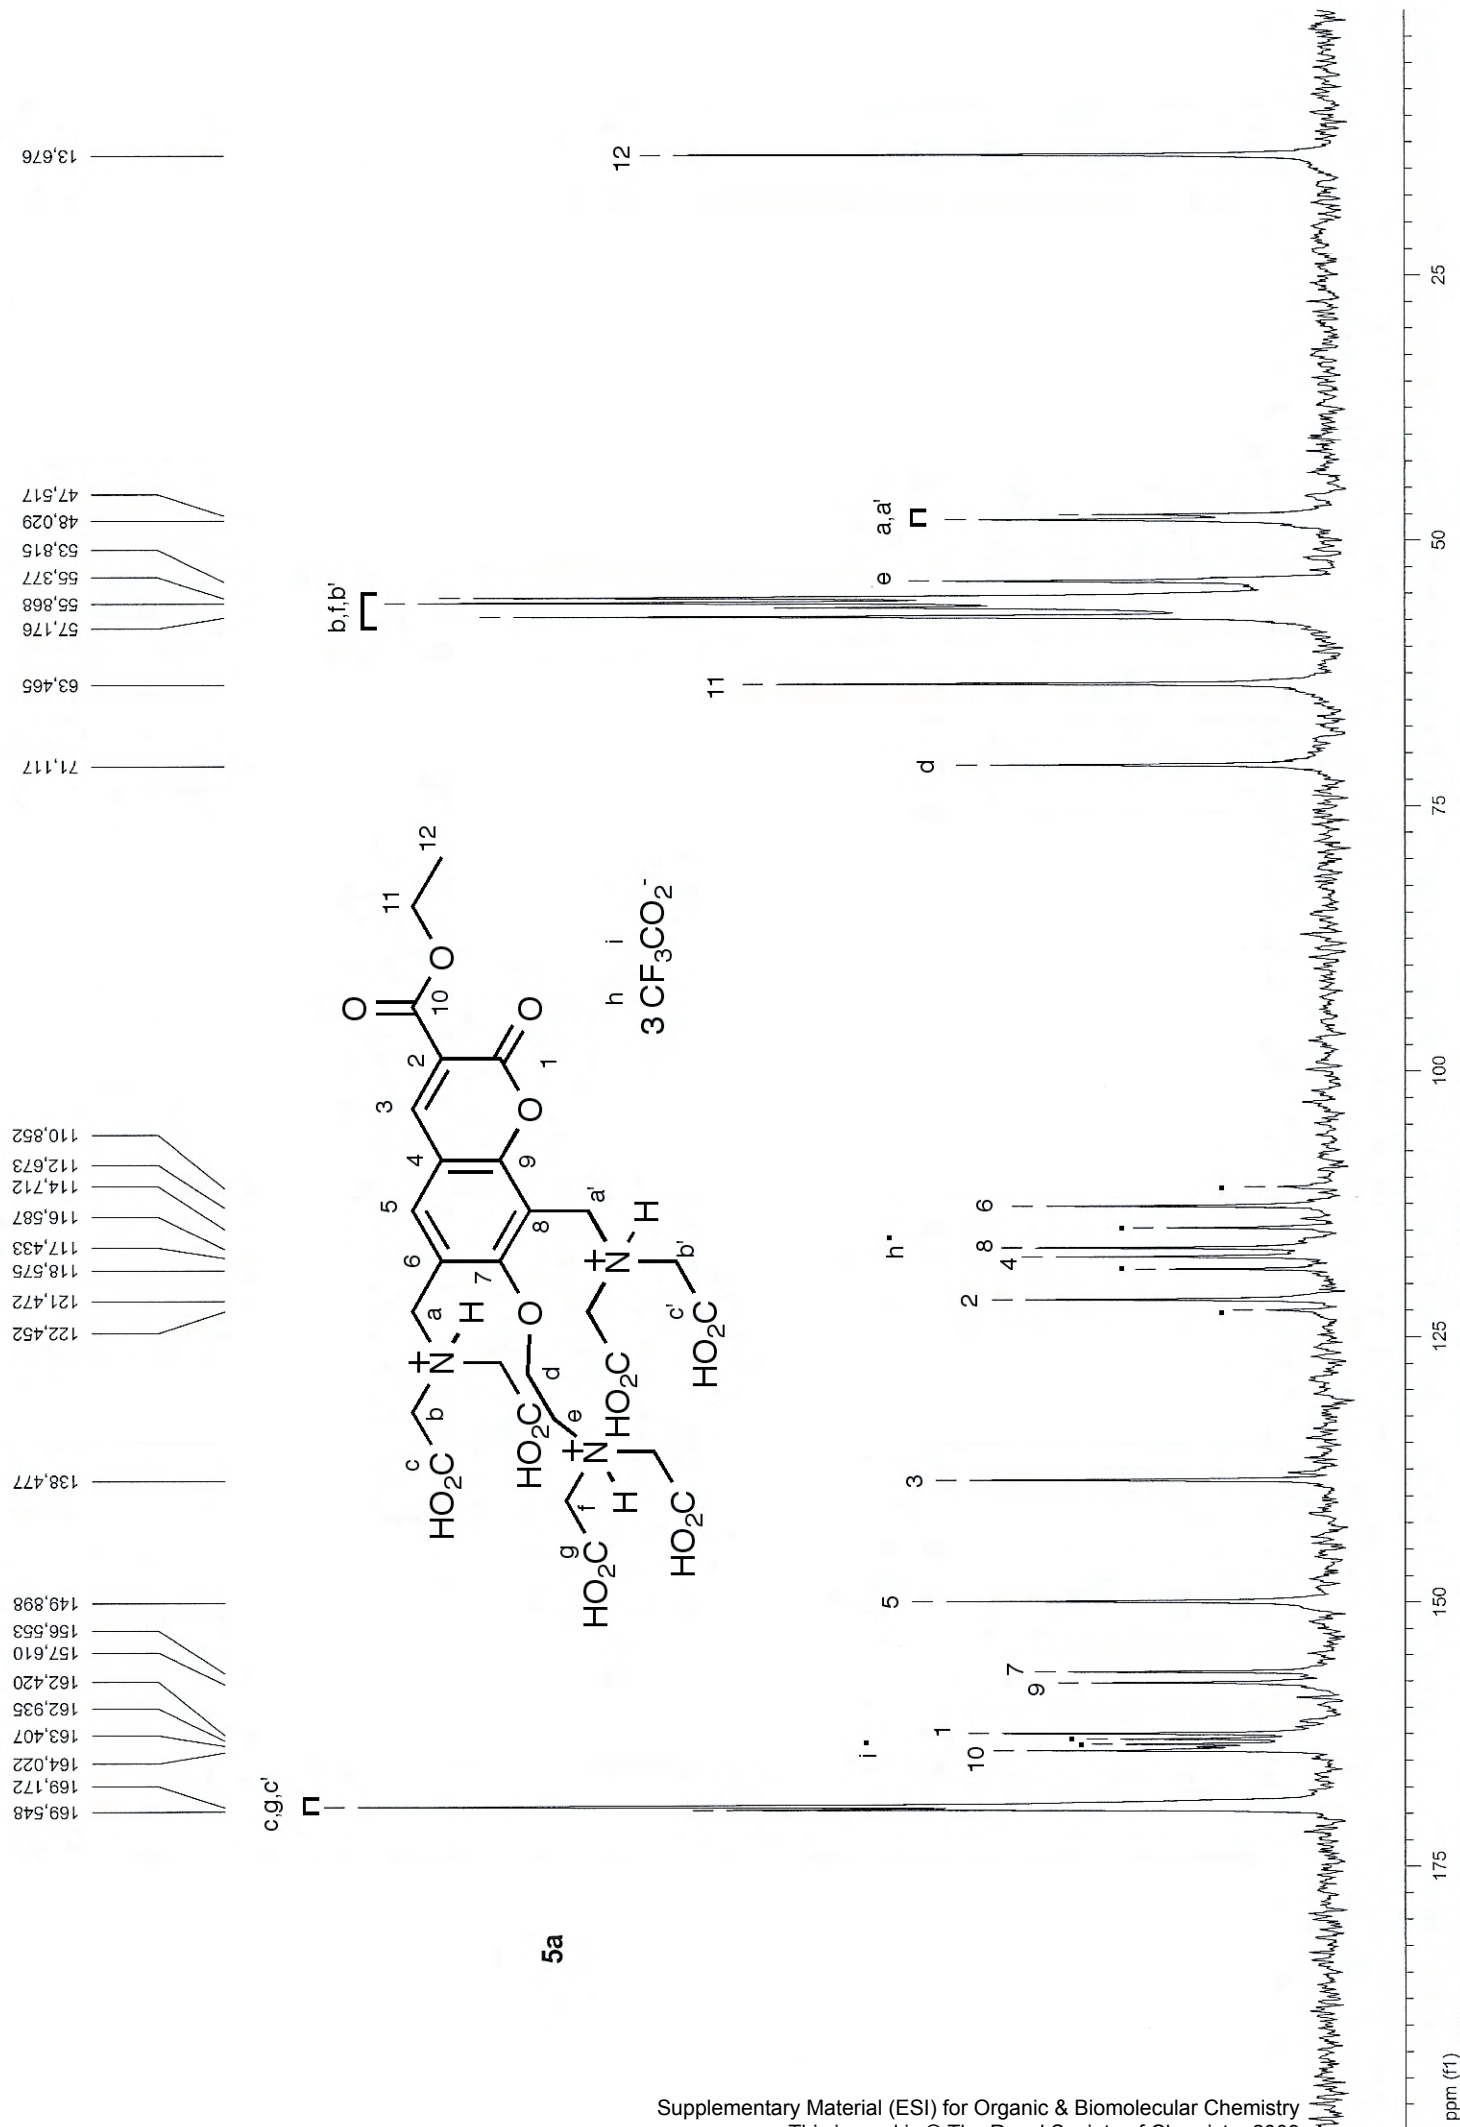



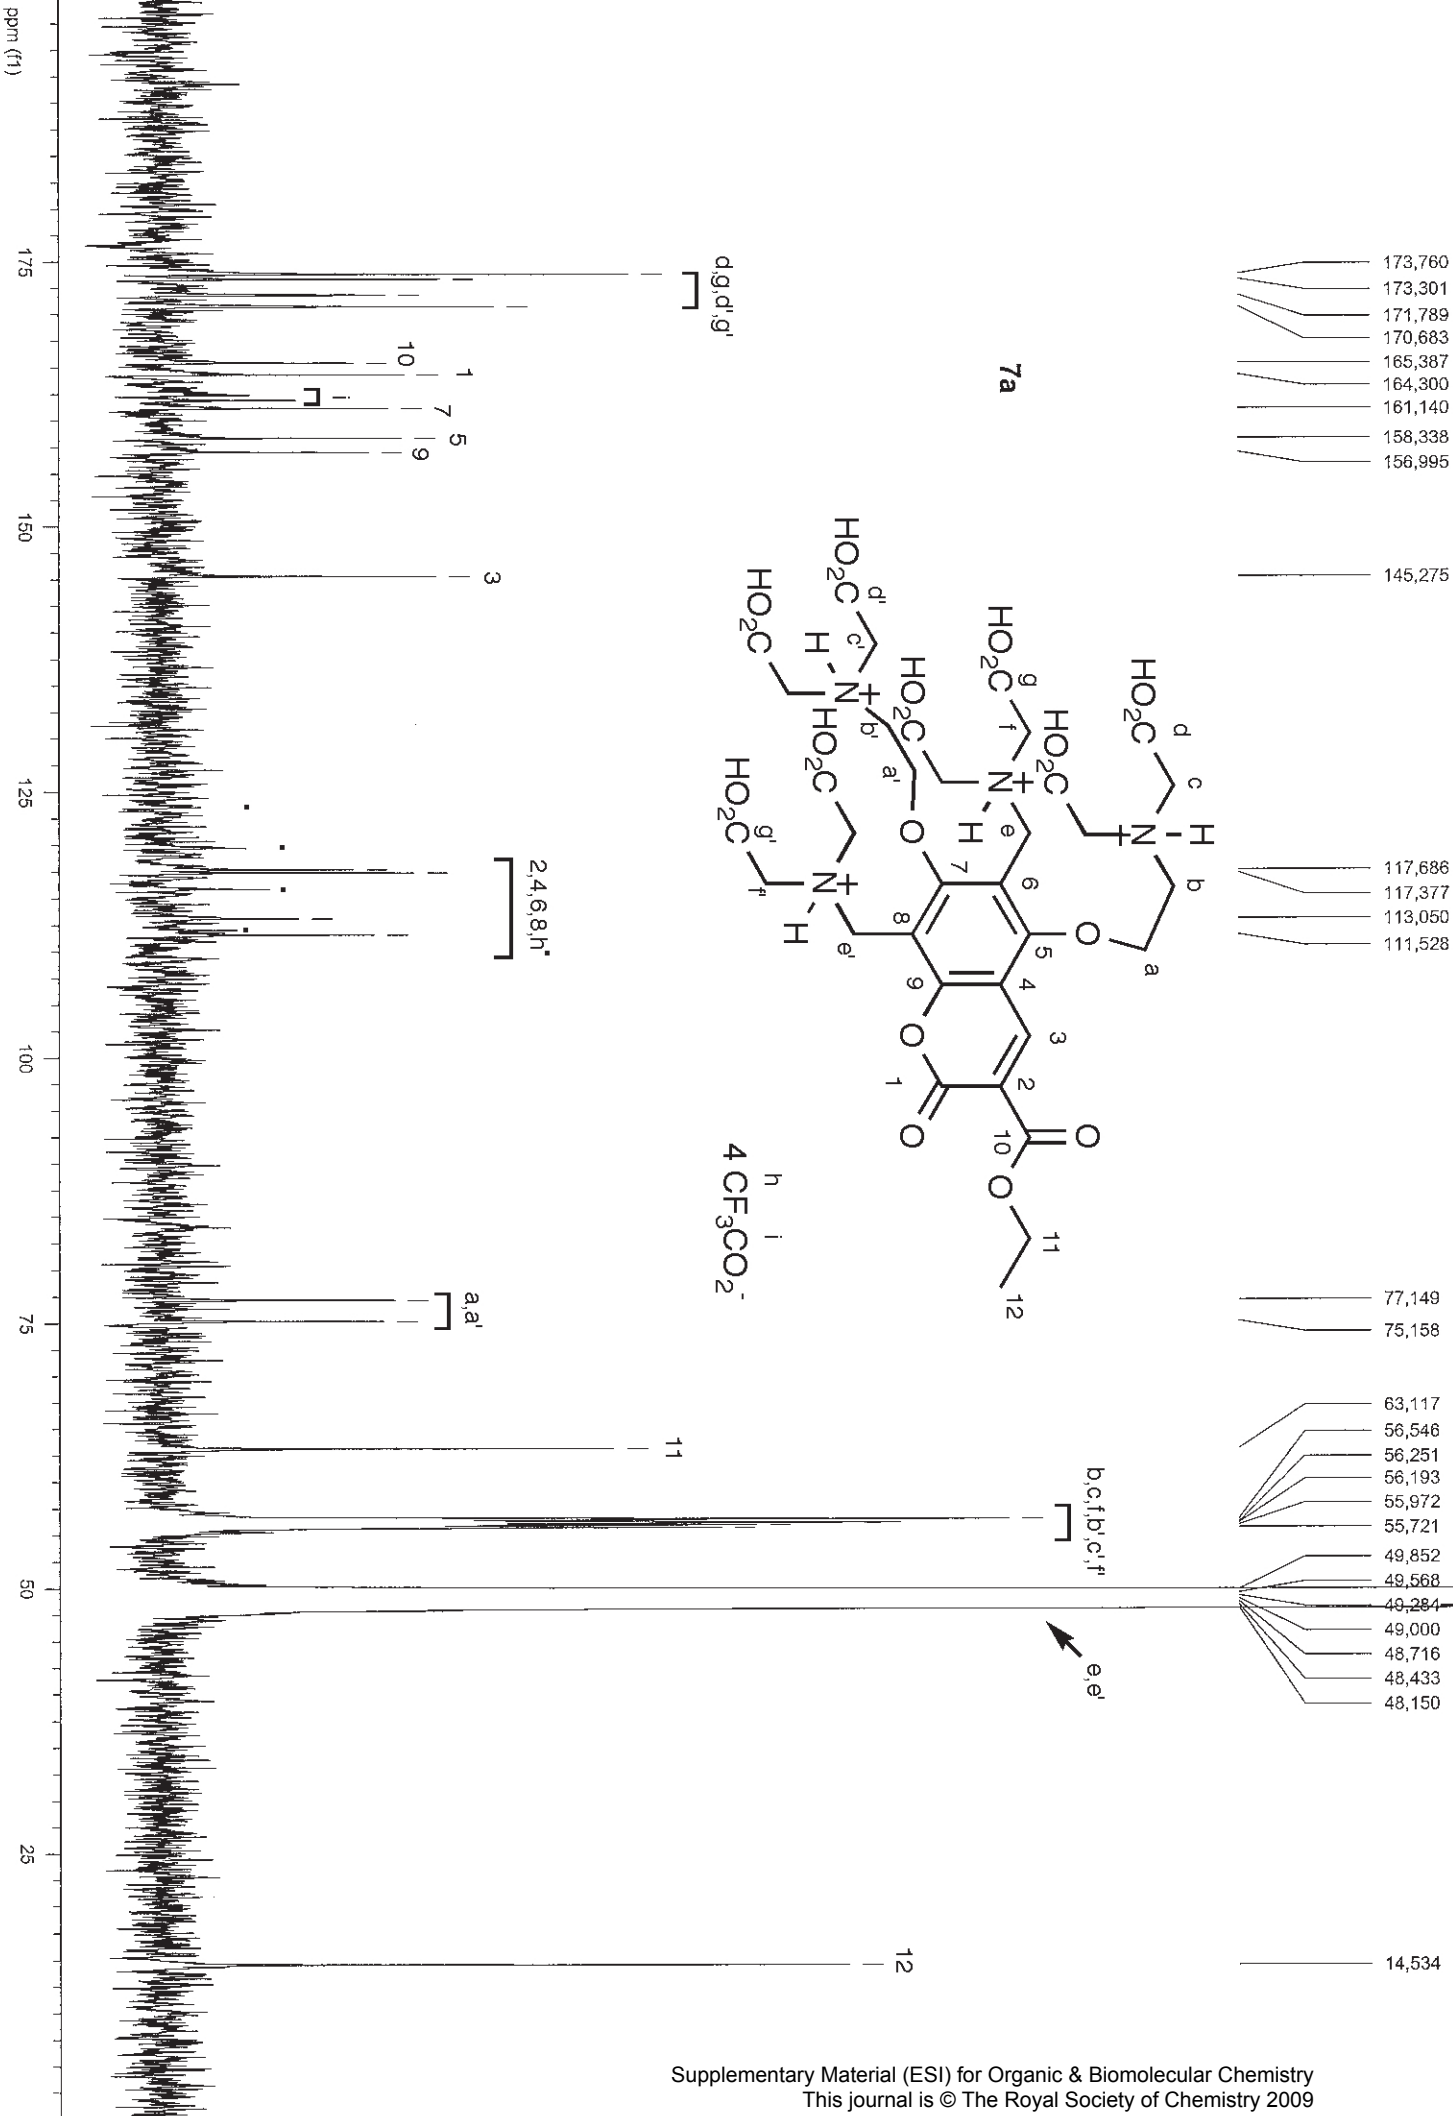

7d

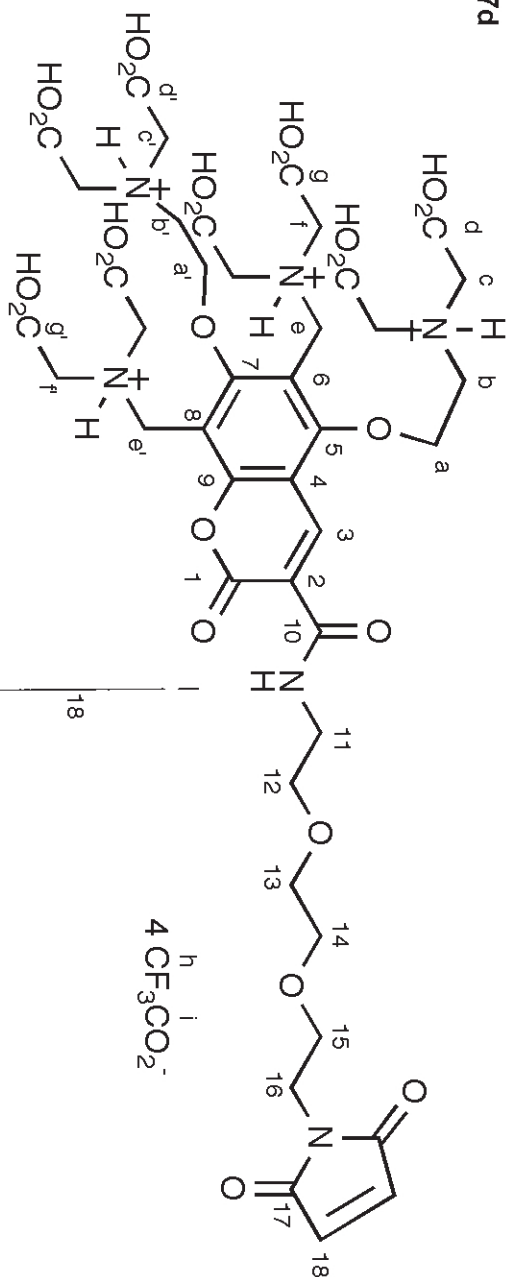

173,040  
172,871  
172,495  
171,565  
170,684  
165,160  
163,373  
161,718  
161,233  
161,181  
161,098  
160,745  
157,719

143,948

135,428

119,332  
118,133  
118,022  
117,918  
115,500  
112,026

76,023  
74,874  
71,443  
71,343  
70,305  
68,953

56,655  
56,335  
55,814  
55,697  
55,573

49,851  
49,567  
49,284  
49,000  
48,716  
48,432  
48,149  
40,828  
38,242

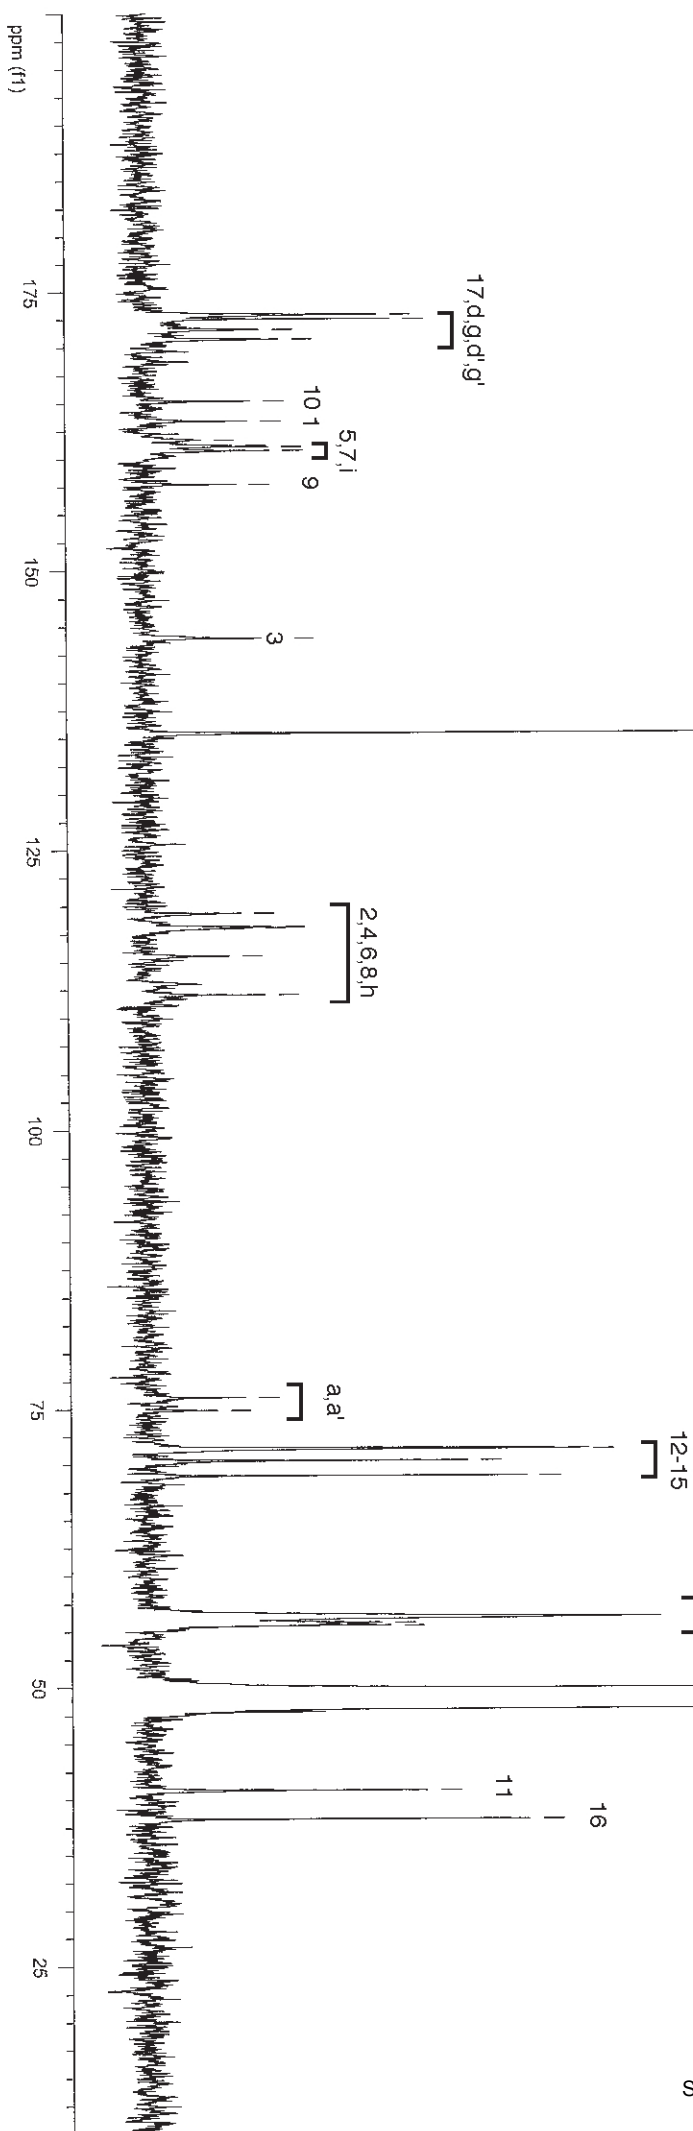



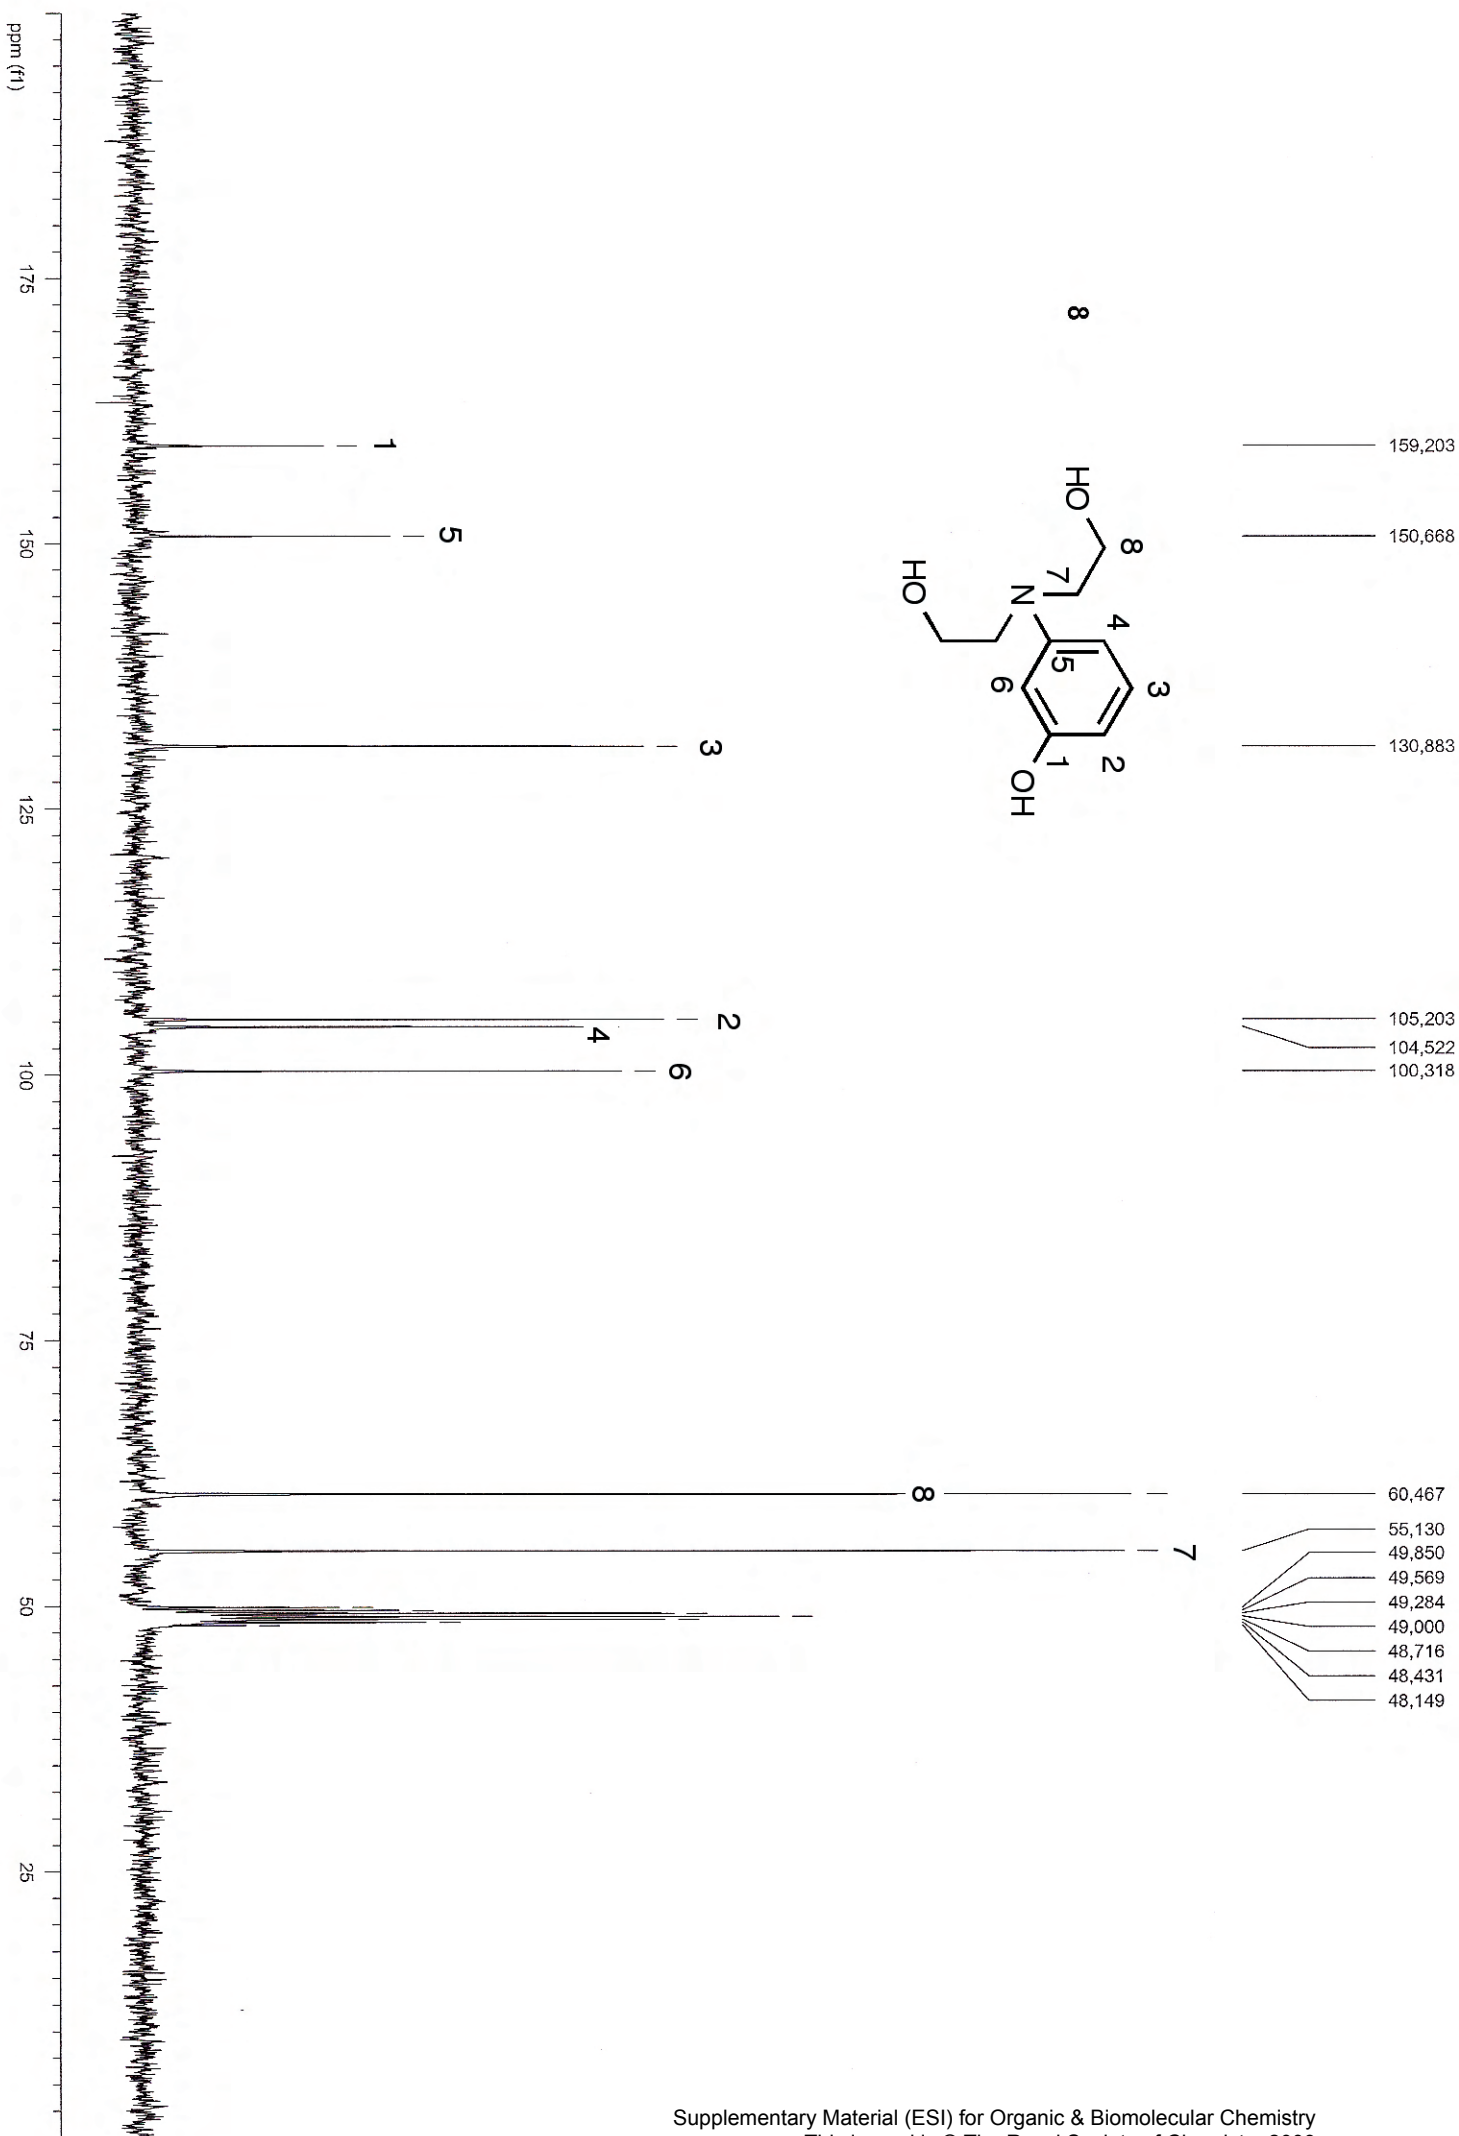

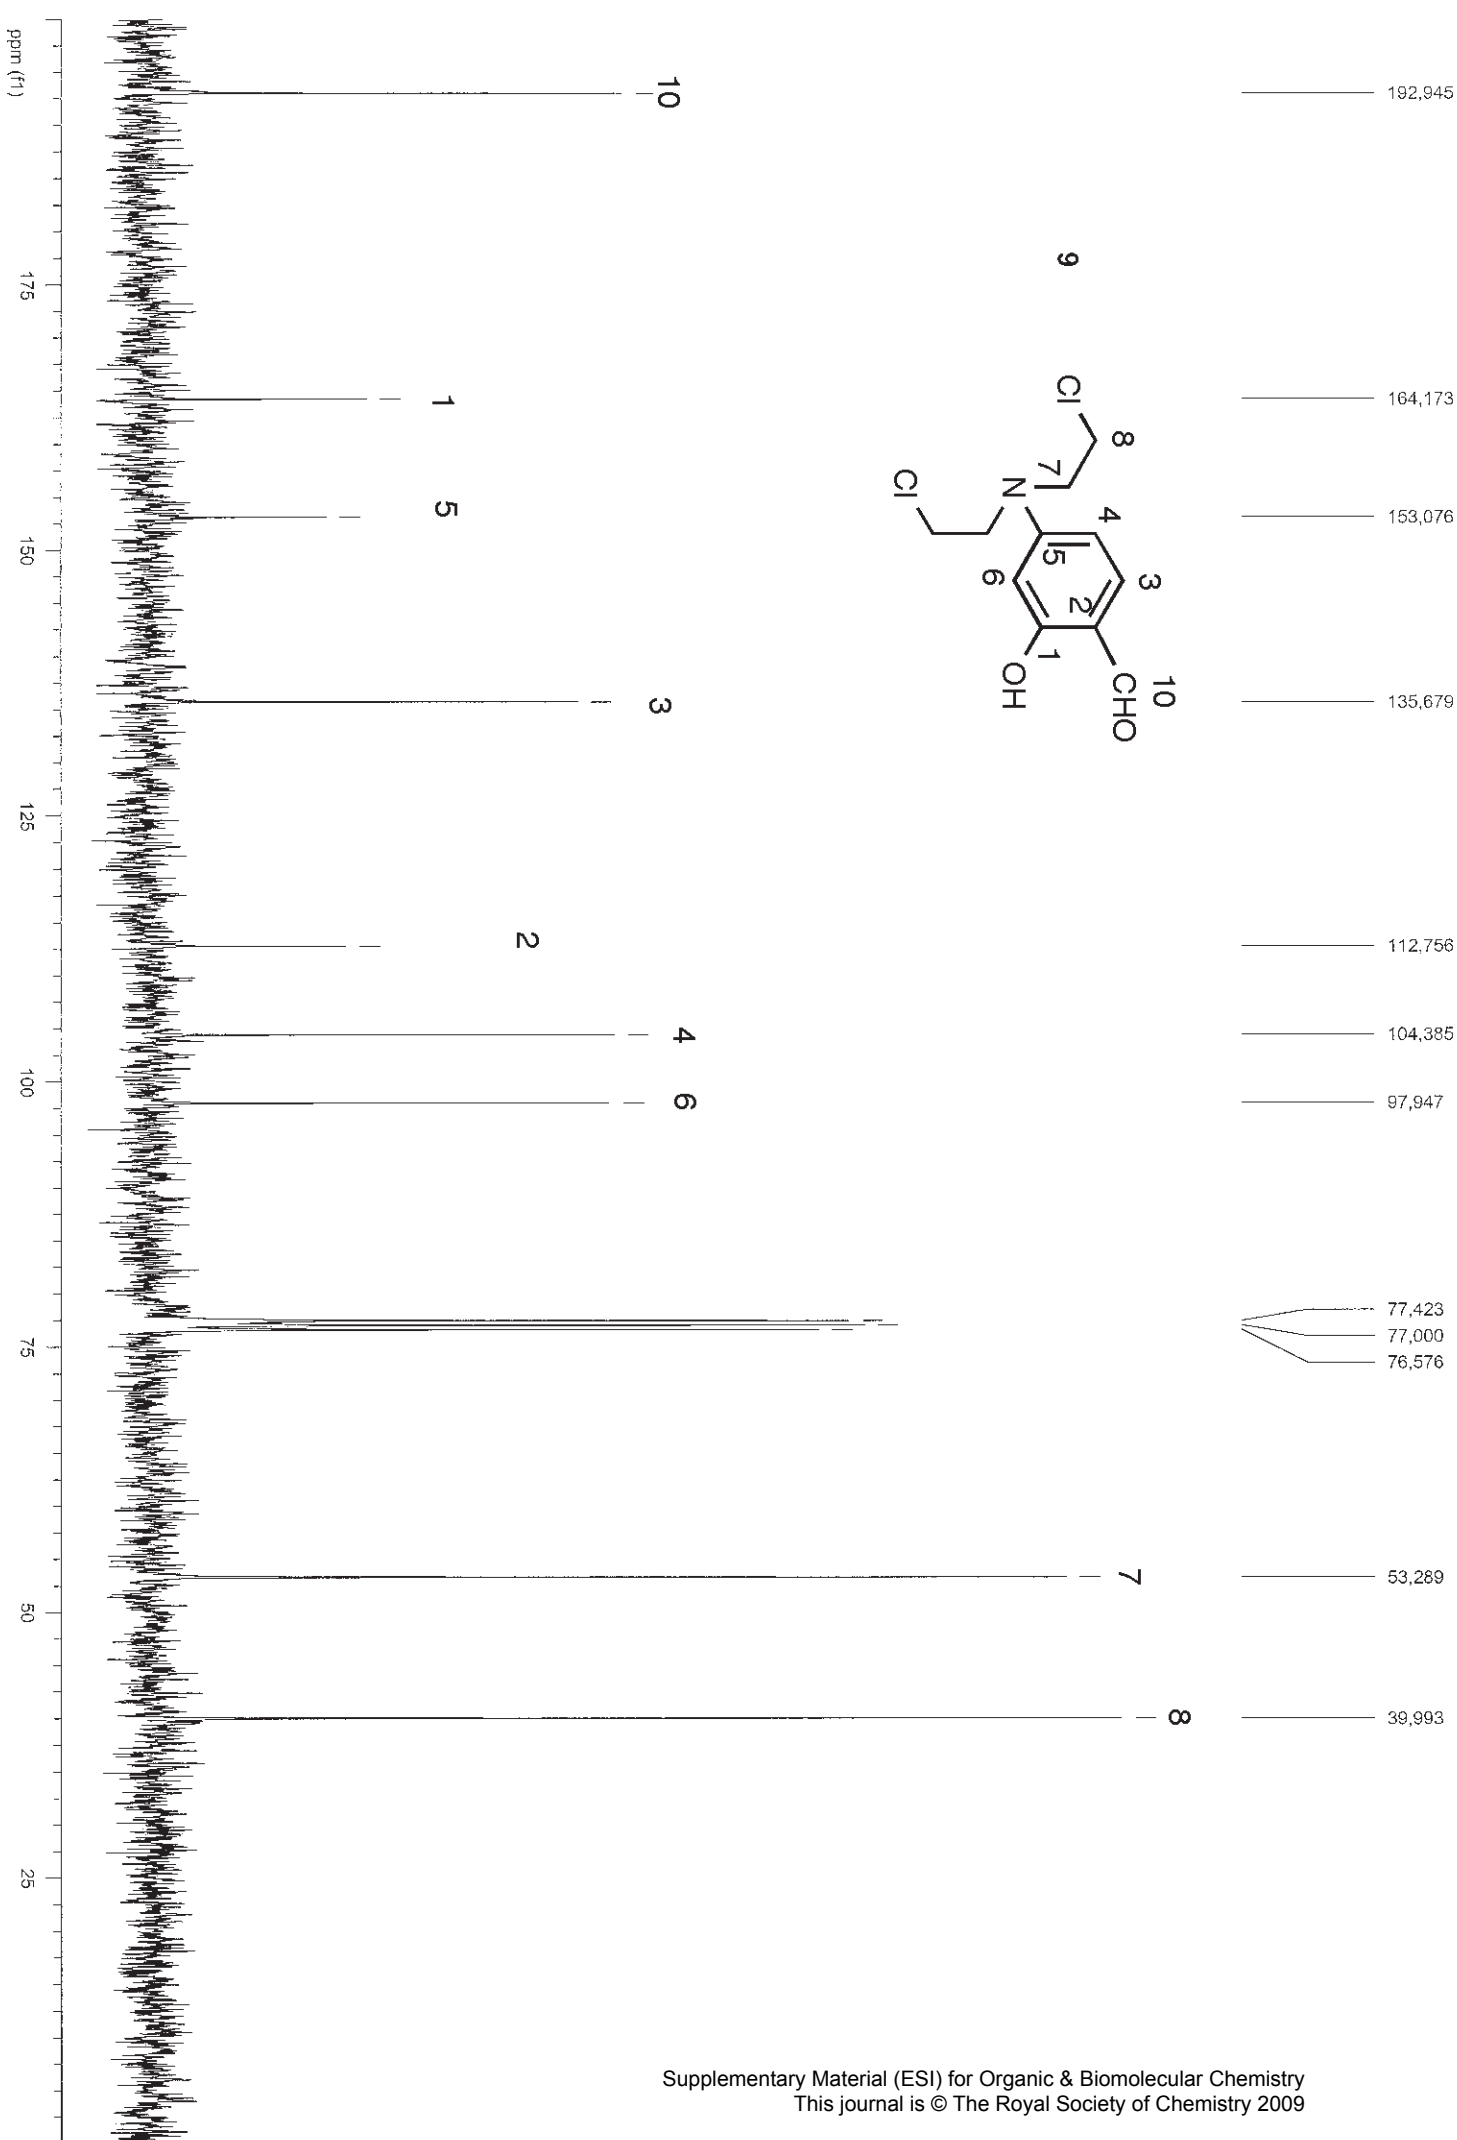

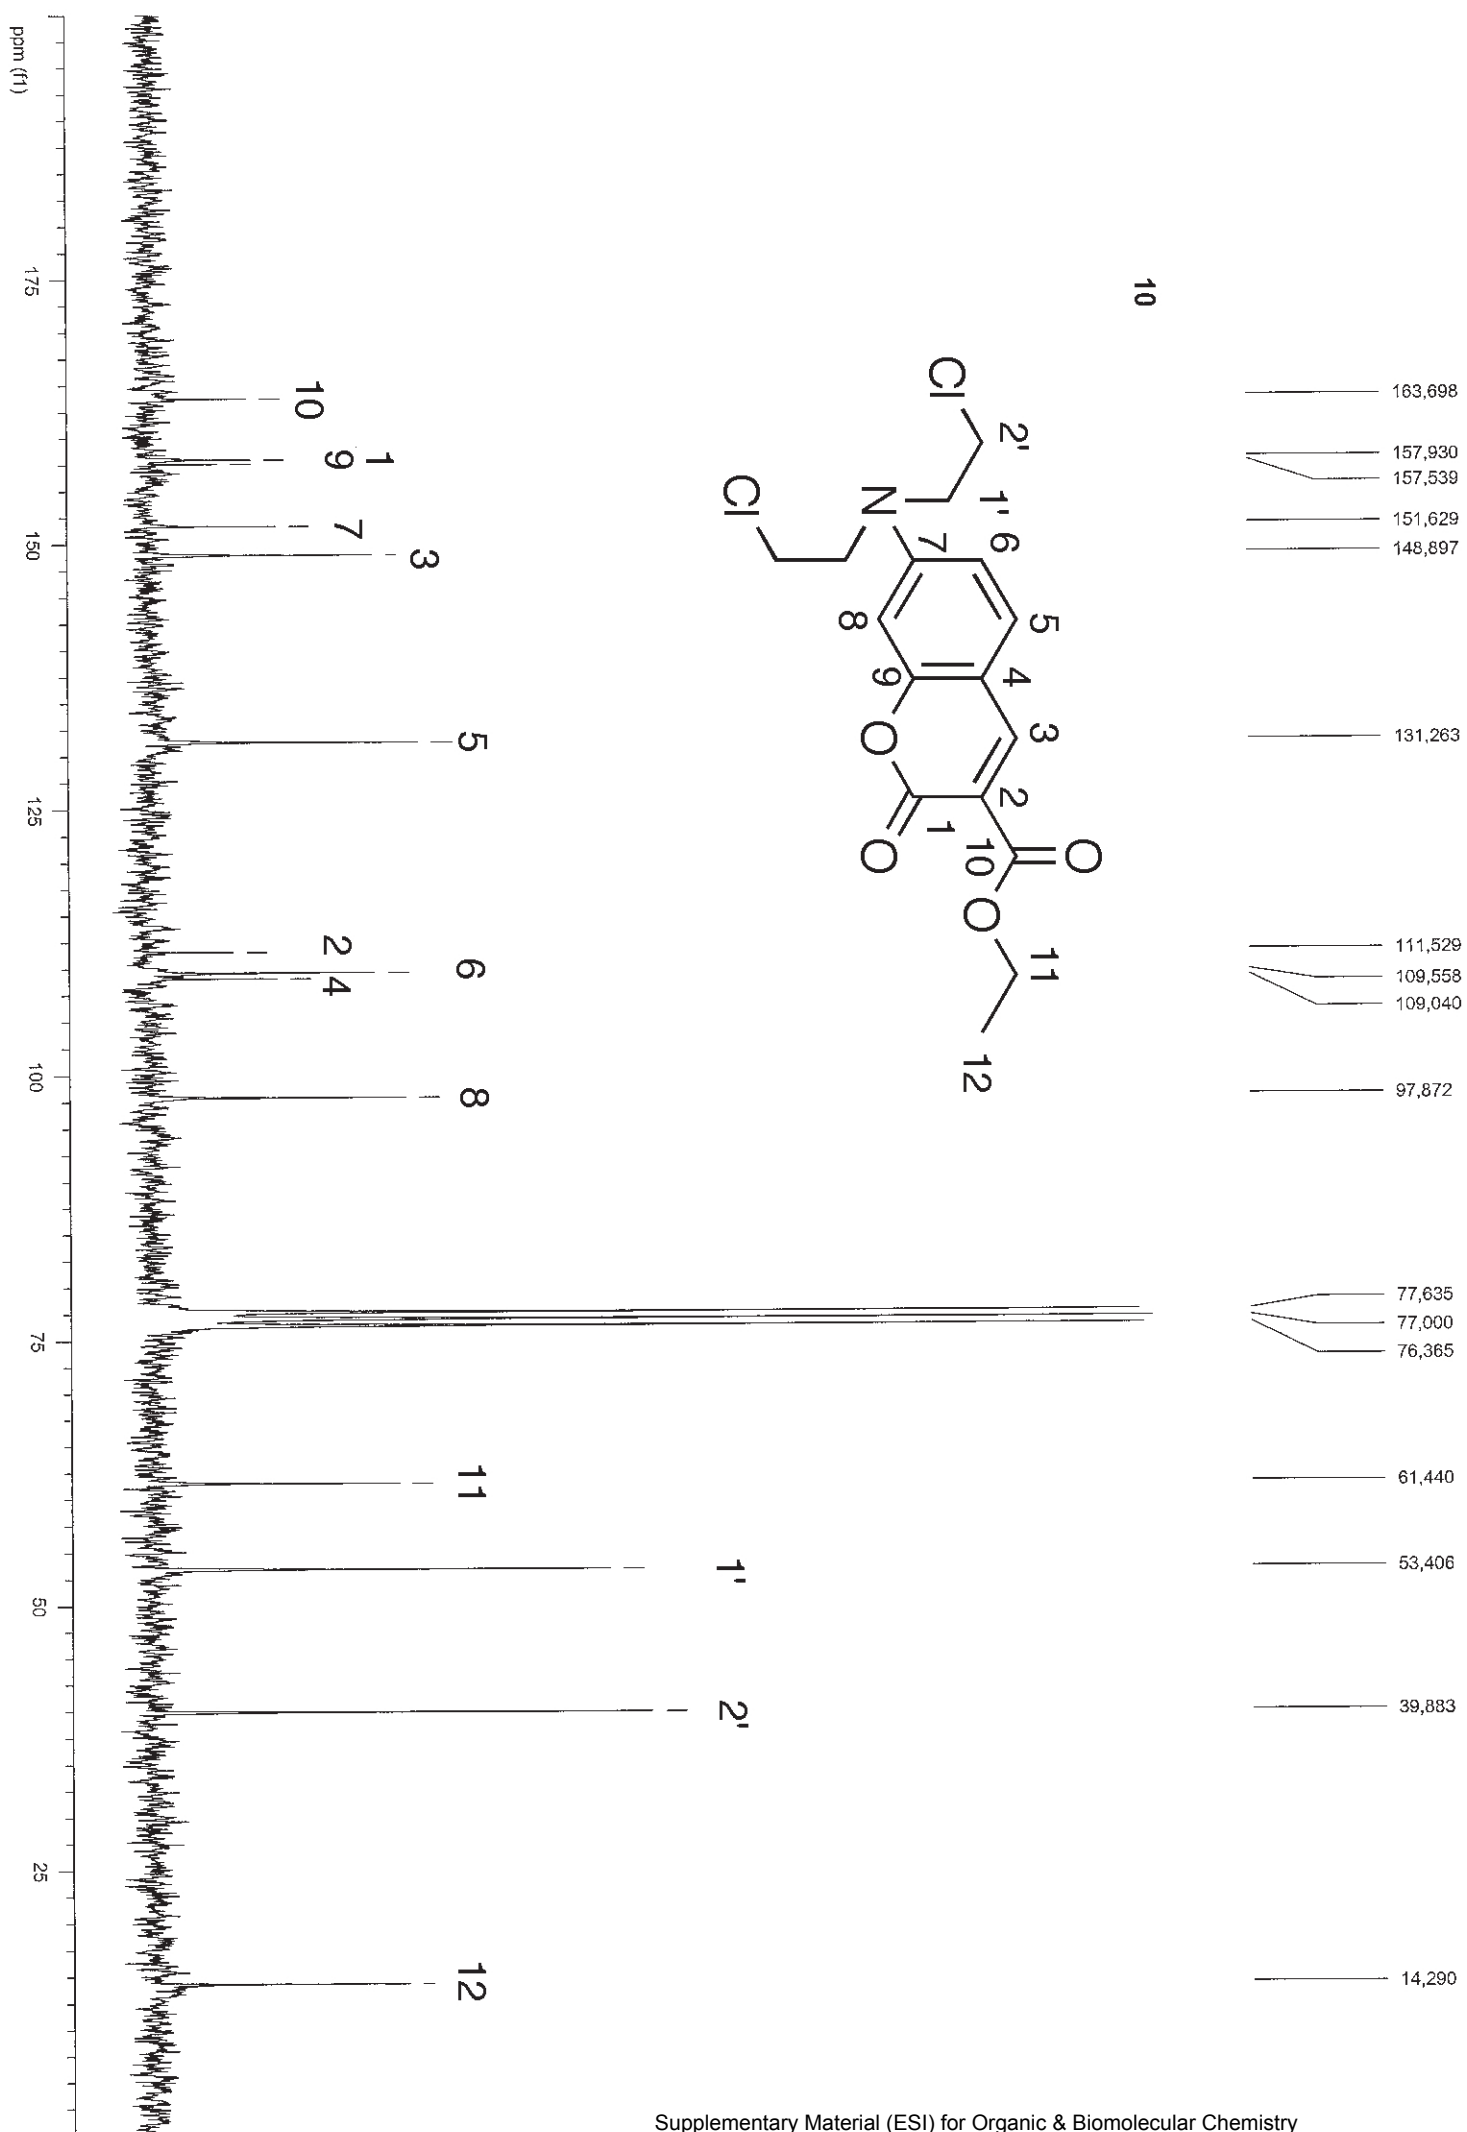

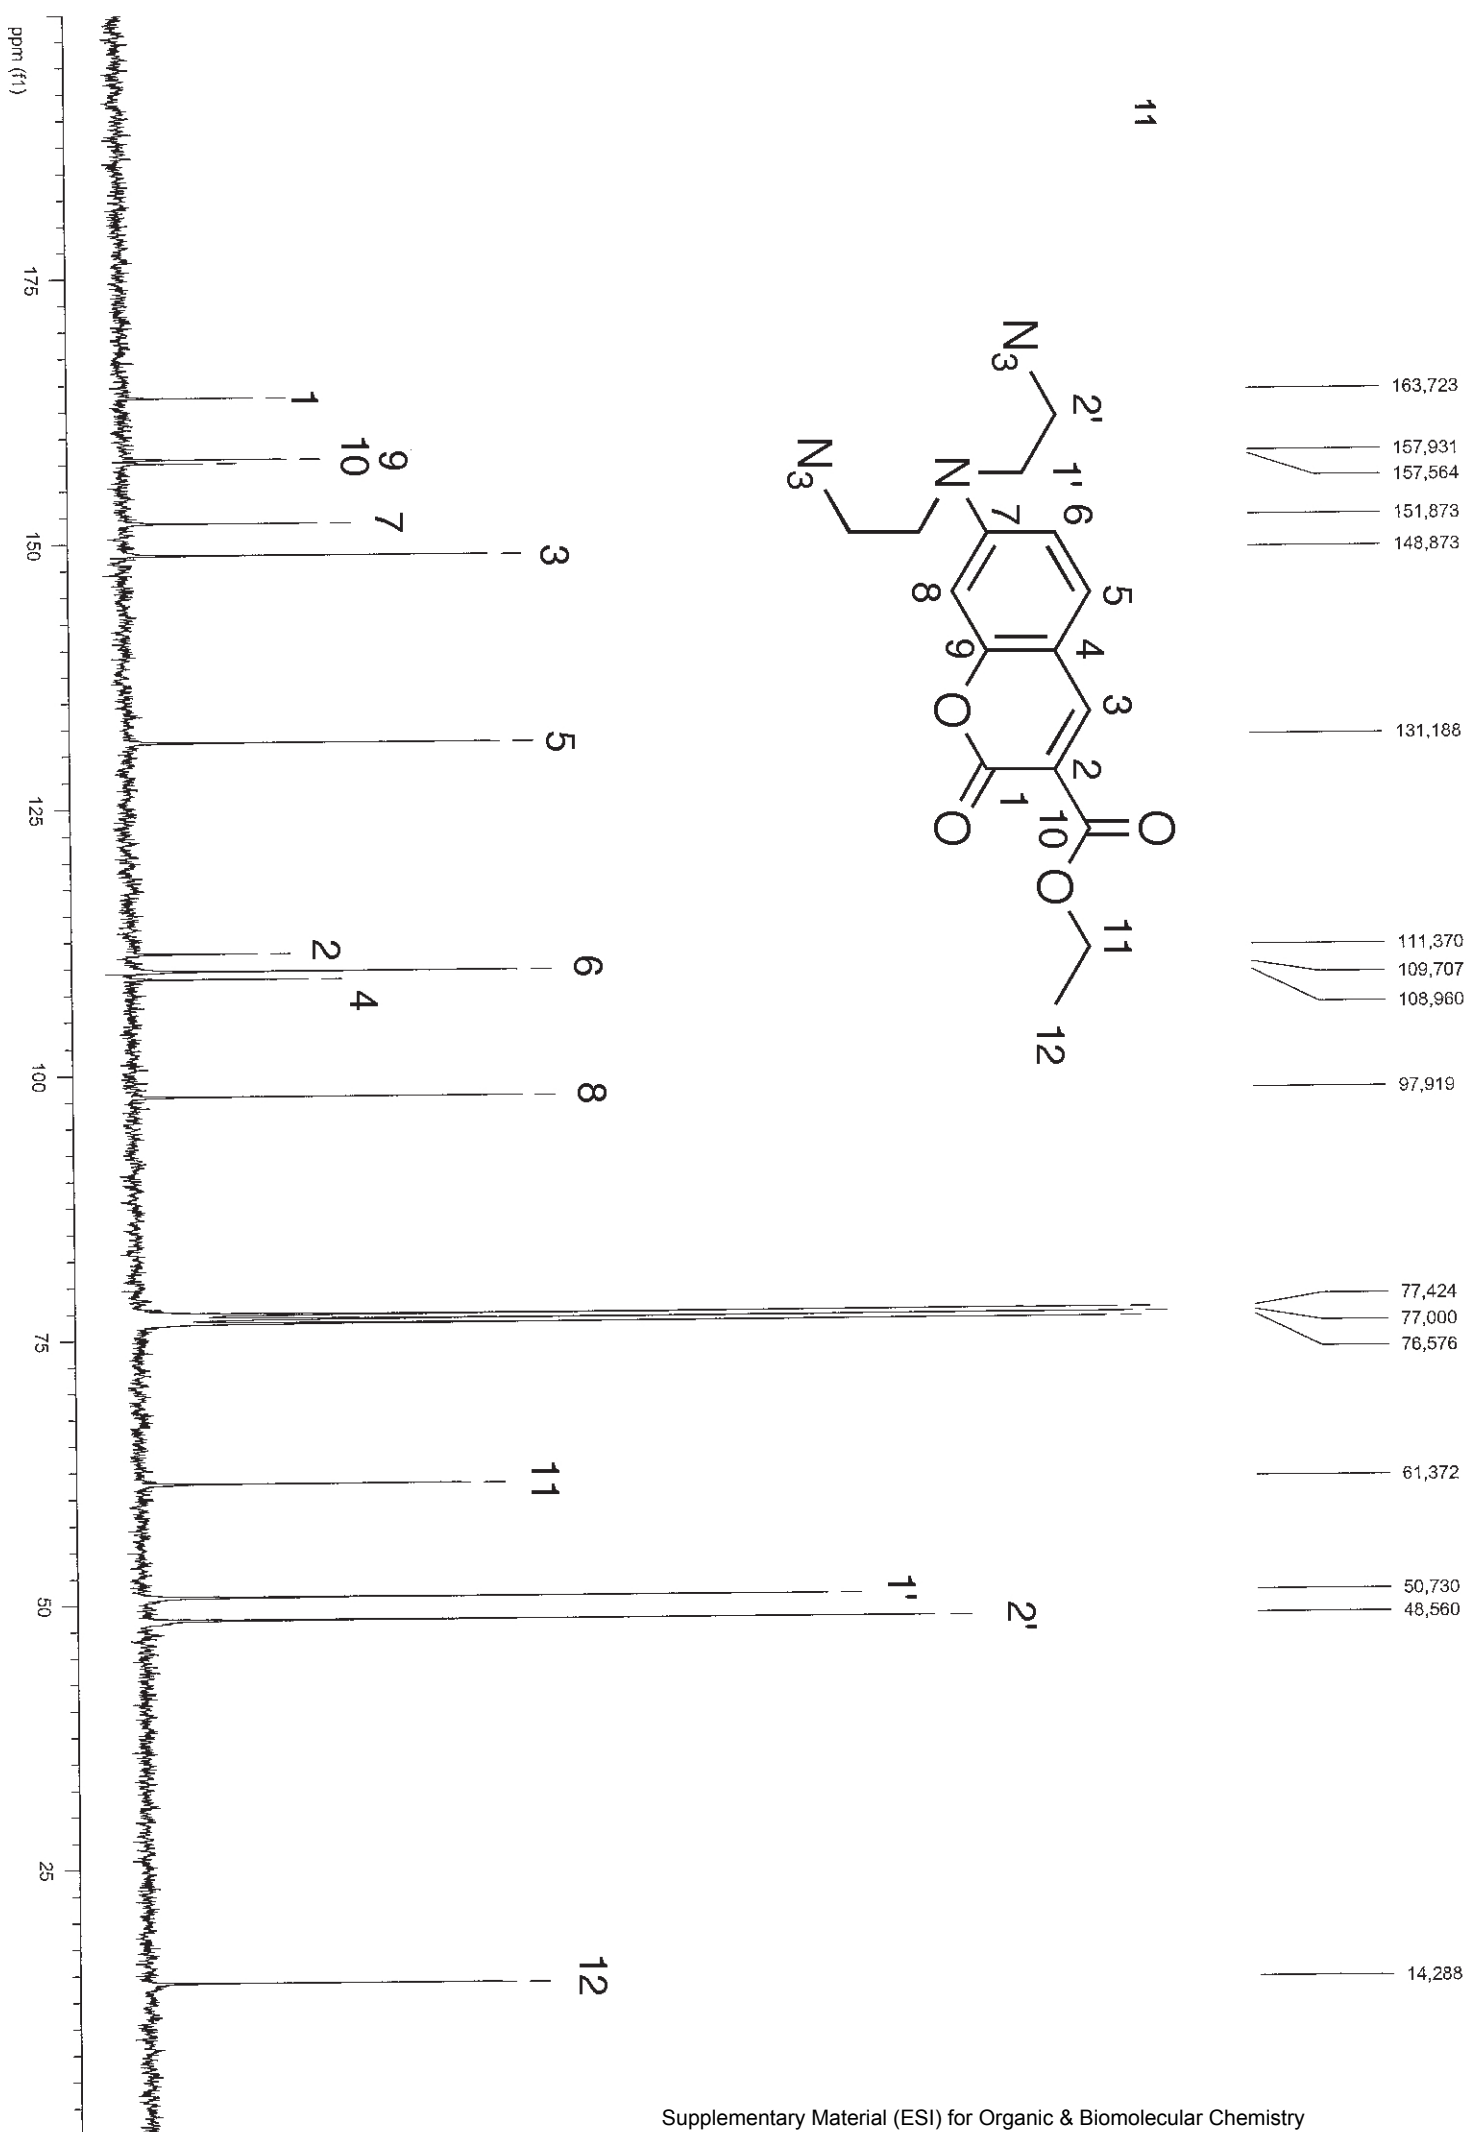

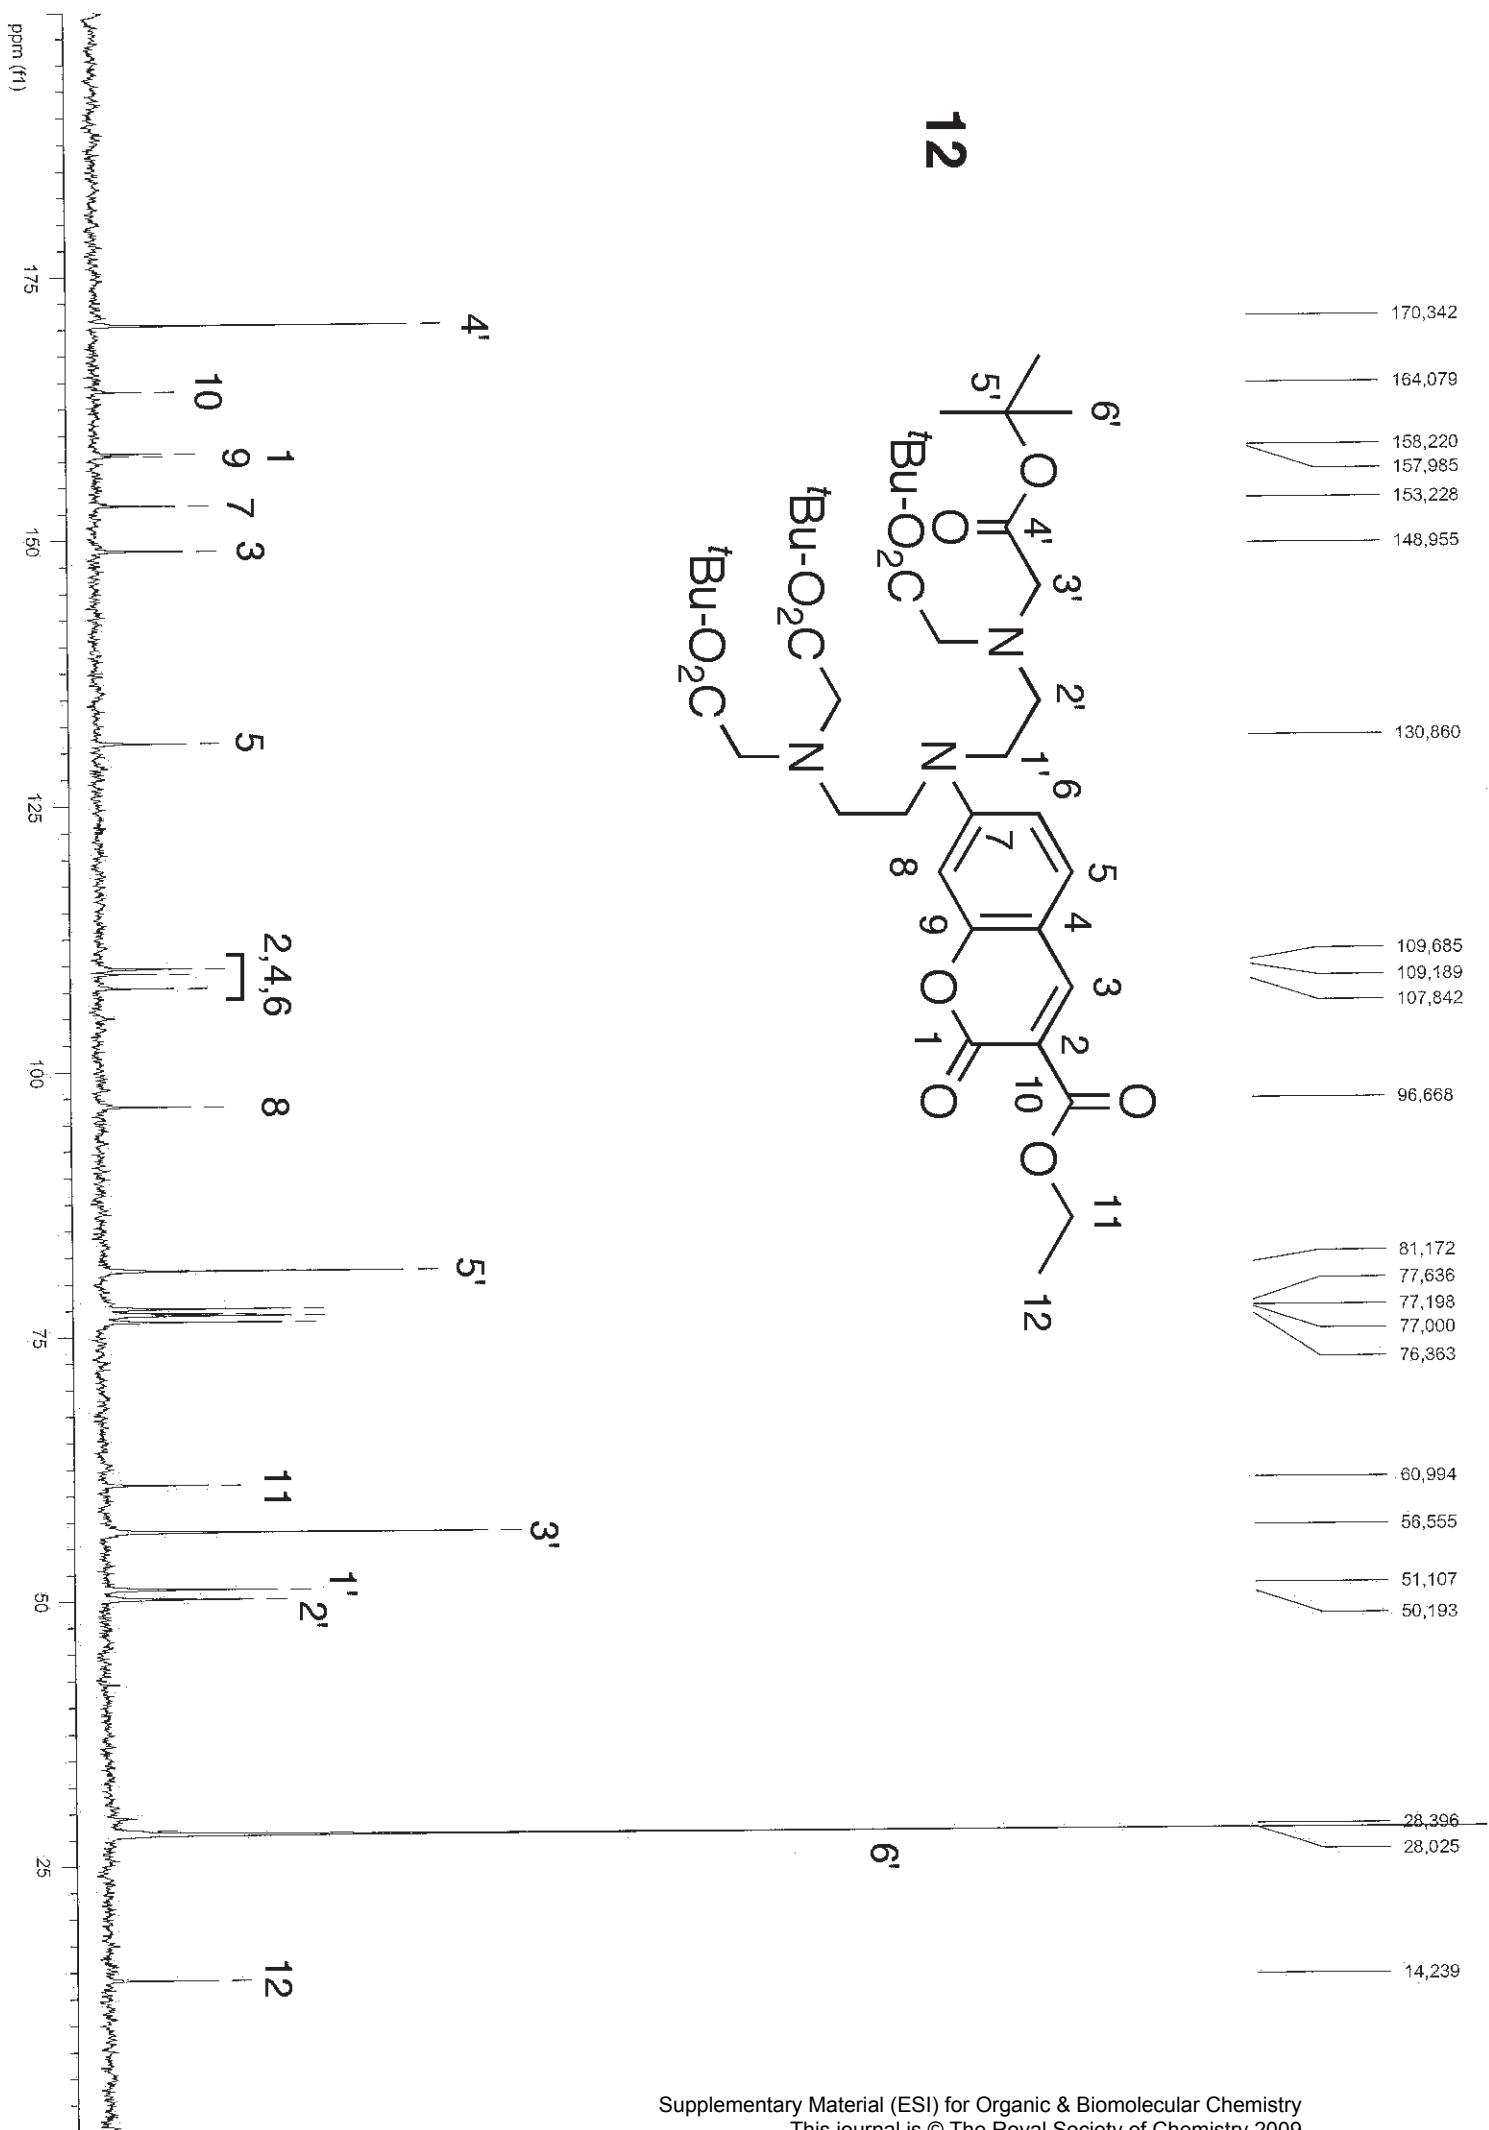





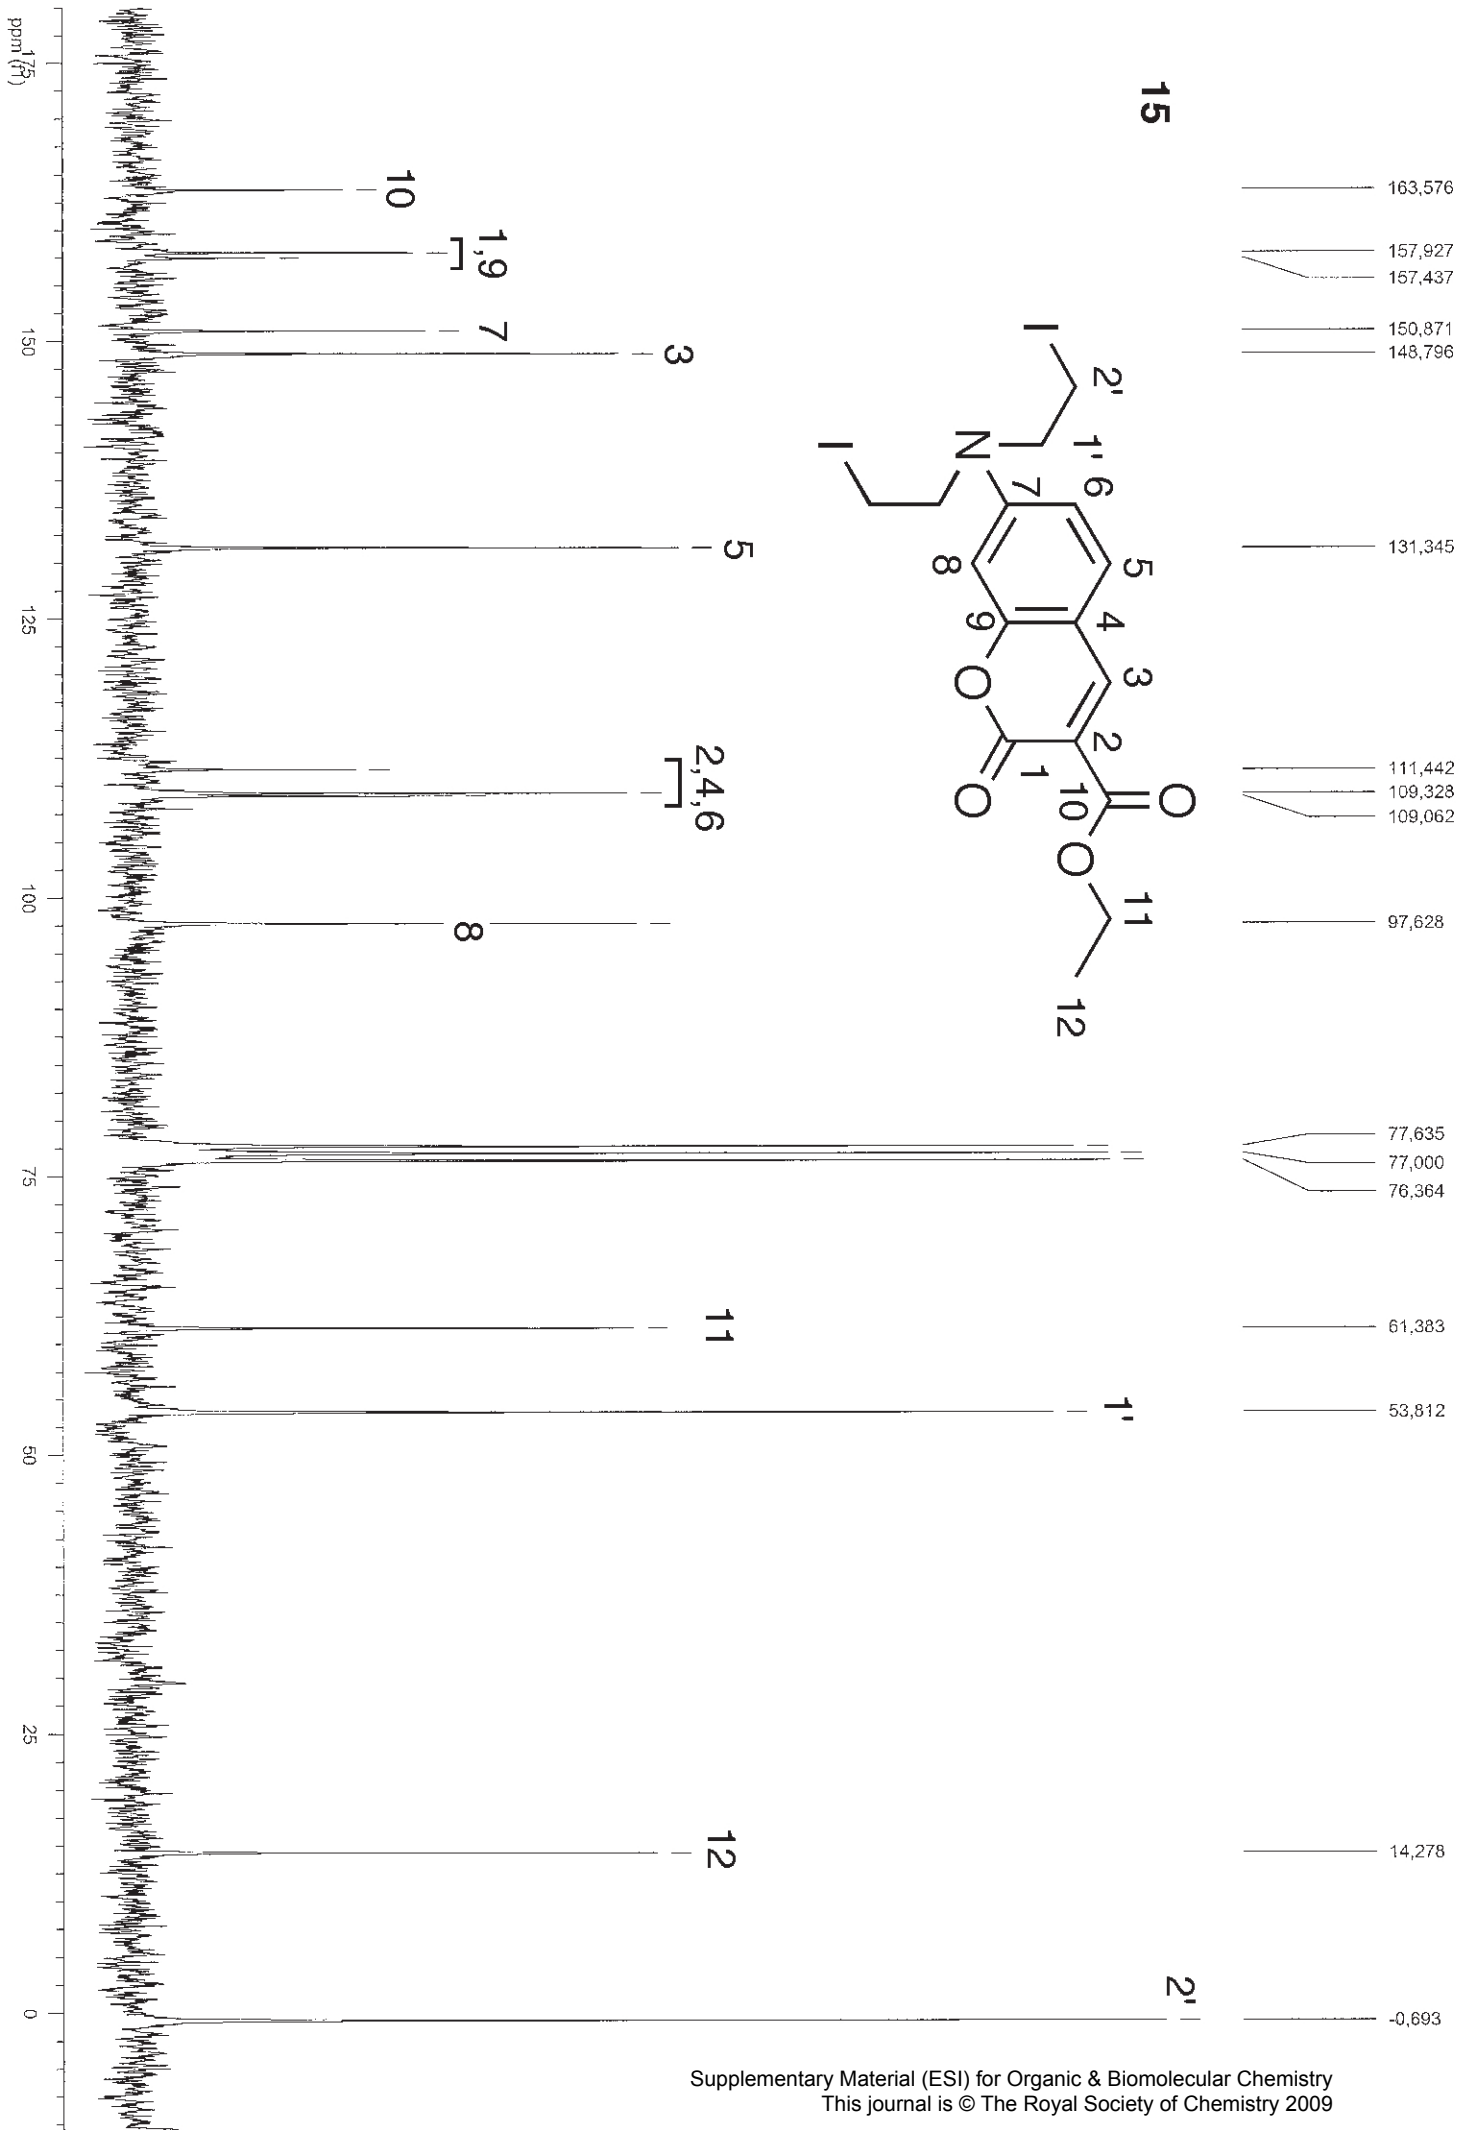



16

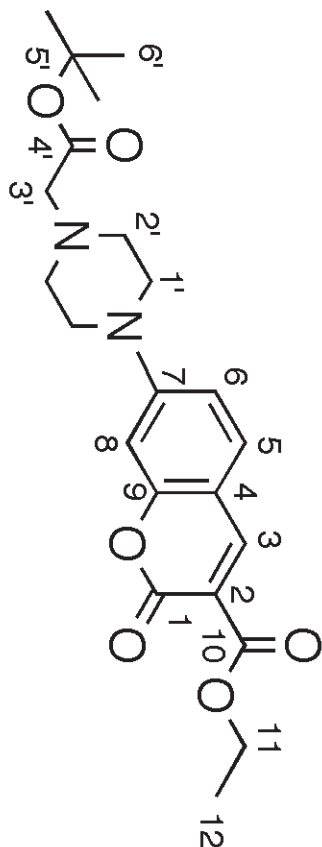

|         |  |
|---------|--|
| 169,217 |  |
| 164,054 |  |
| 158,085 |  |
| 157,990 |  |
| 155,229 |  |
| 149,085 |  |
| 130,842 |  |
| 111,566 |  |
| 111,463 |  |
| 109,420 |  |
| 99,680  |  |
| 81,745  |  |
| 77,797  |  |
| 77,160  |  |
| 76,523  |  |
| 61,517  |  |
| 59,657  |  |
| 52,297  |  |
| 46,987  |  |
| 29,828  |  |
| 28,268  |  |
| 14,470  |  |

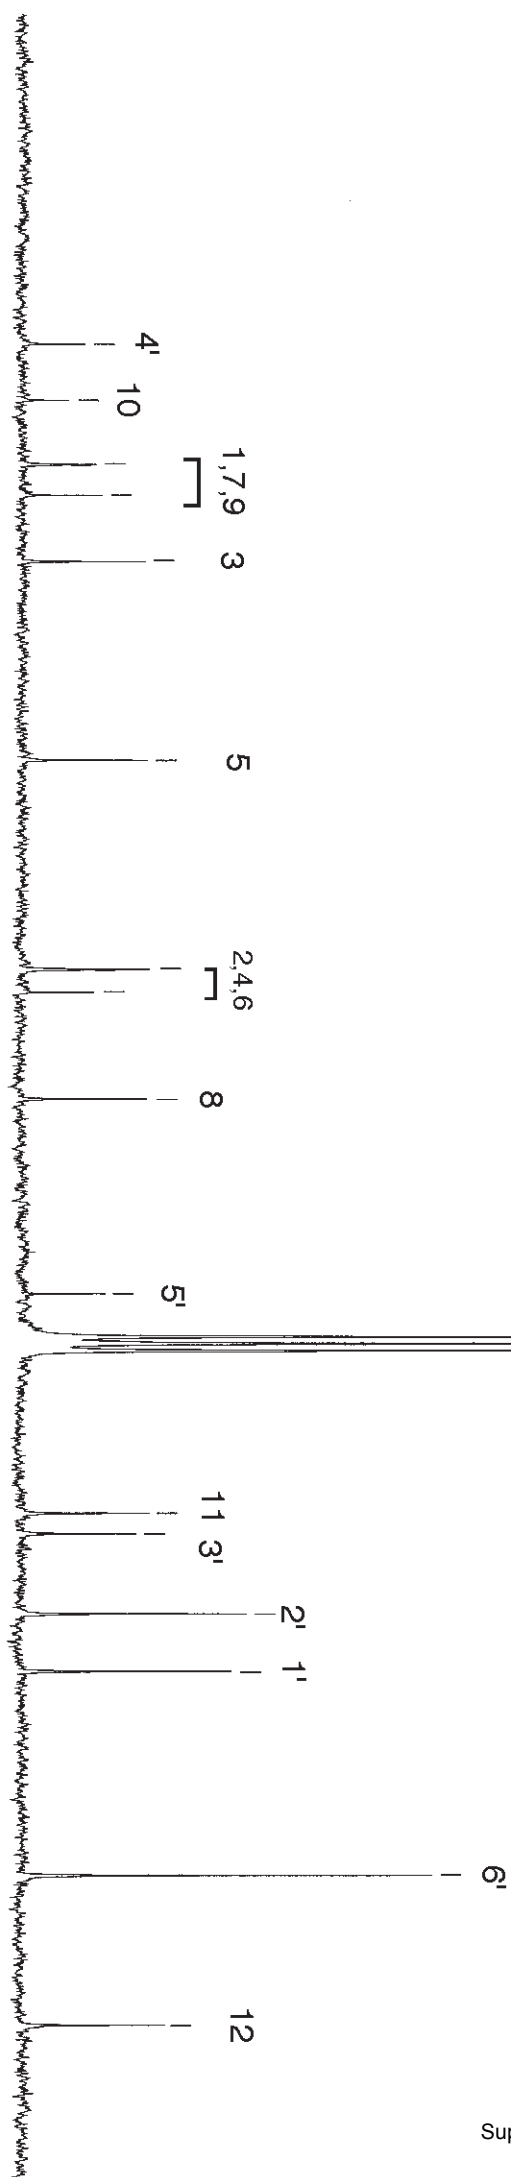



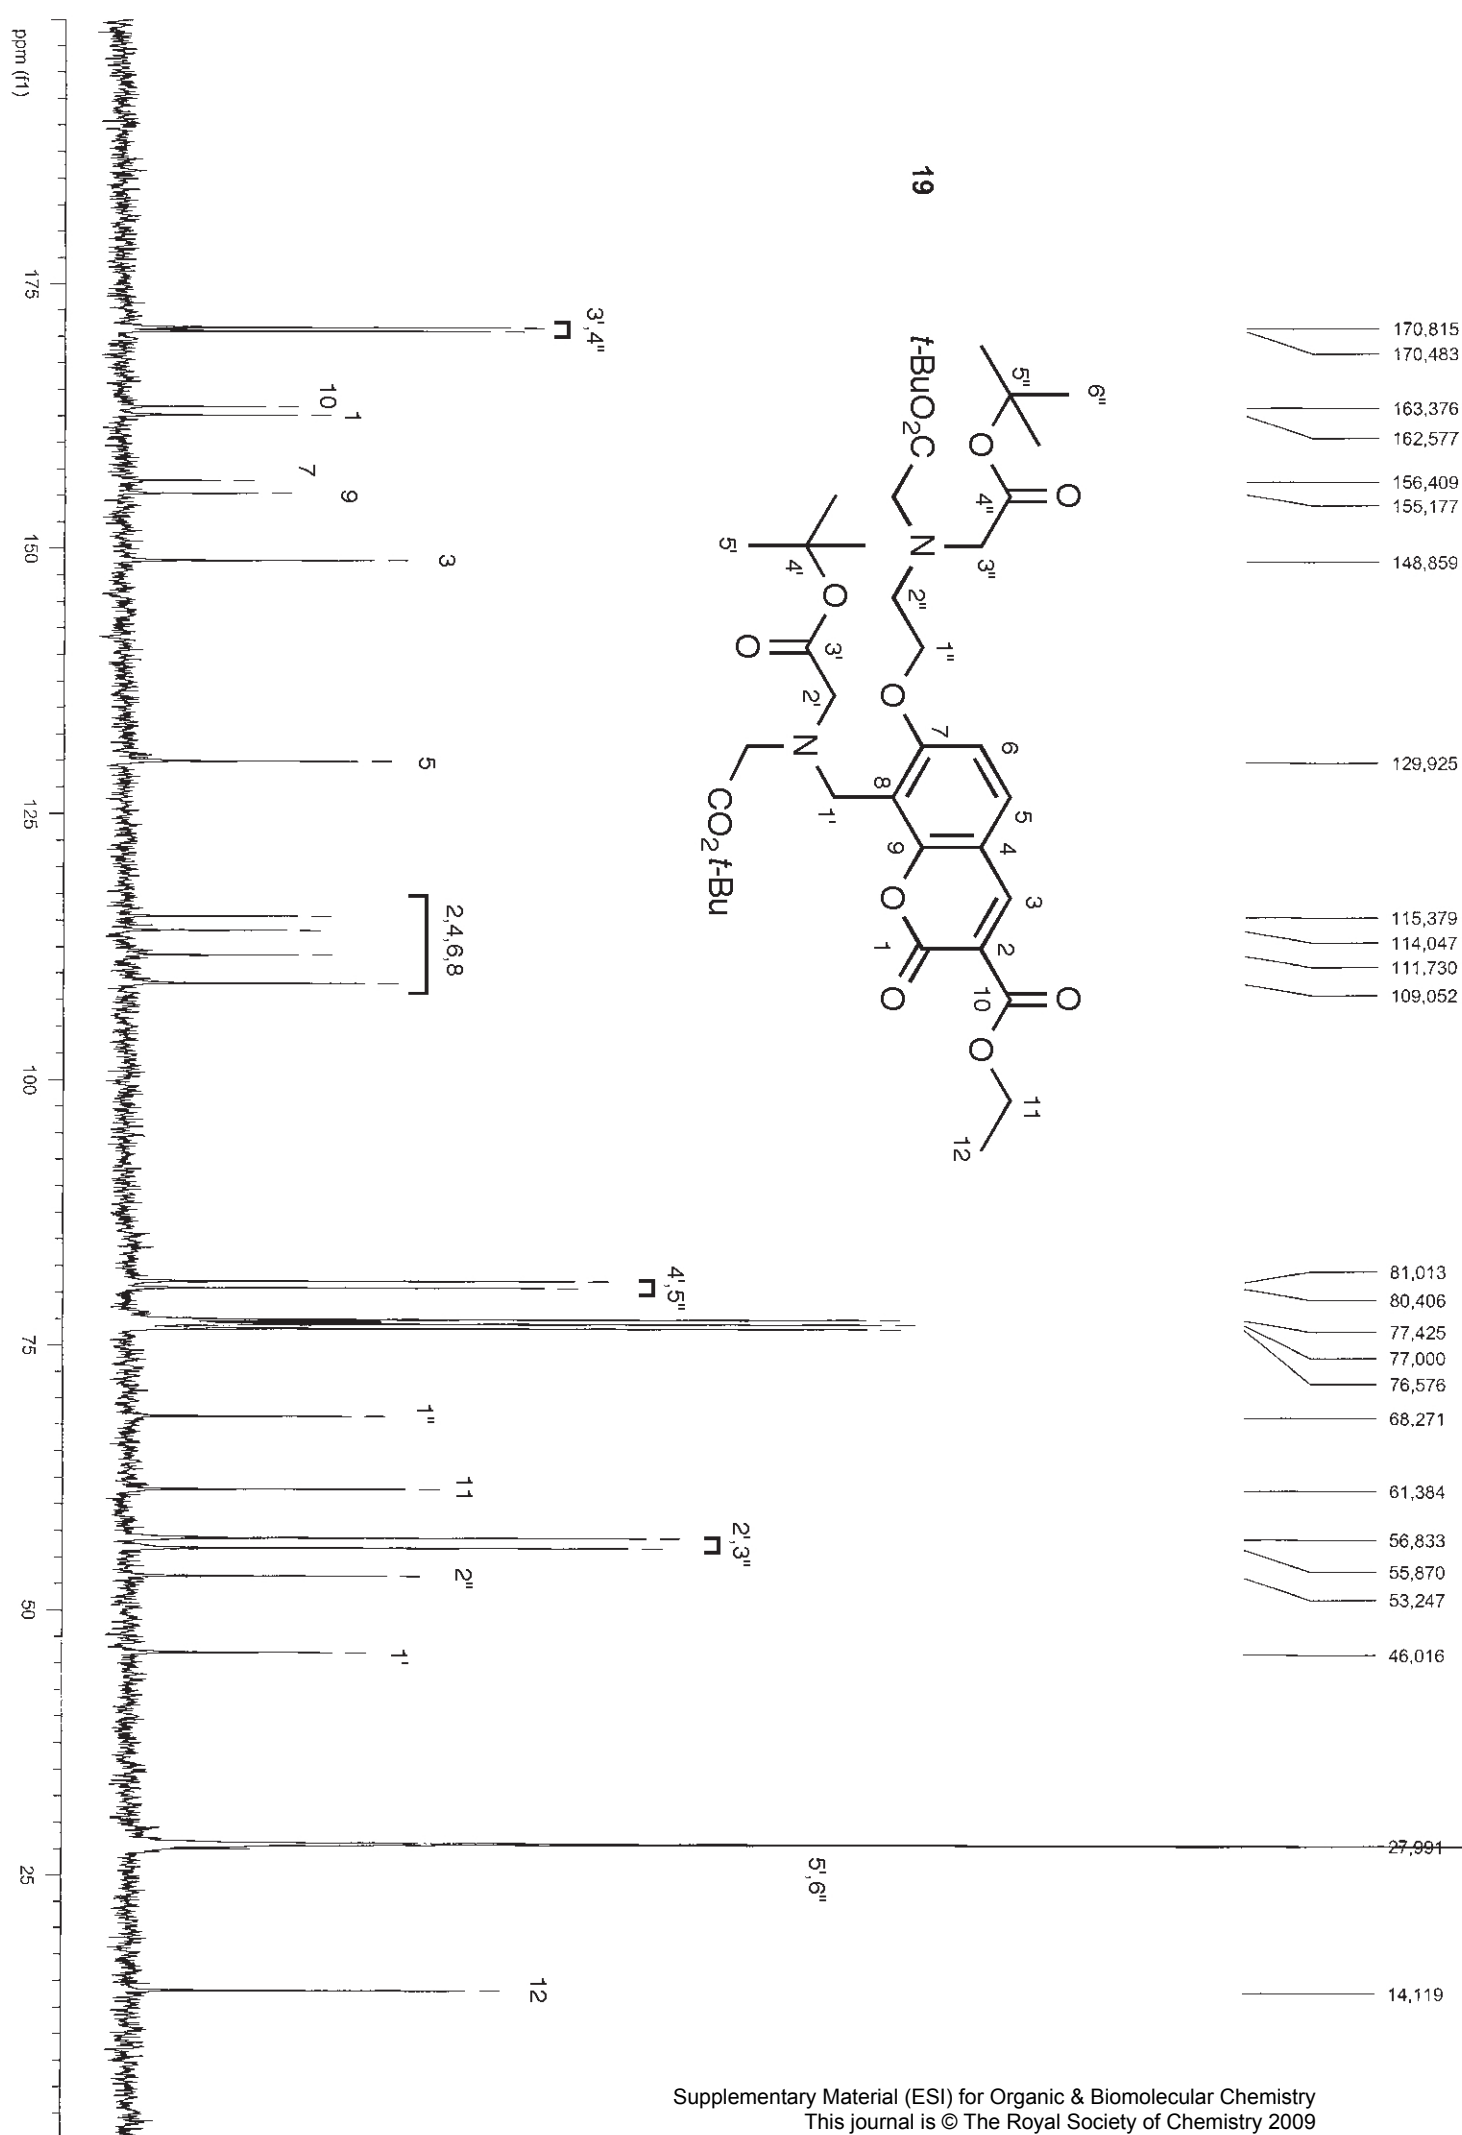

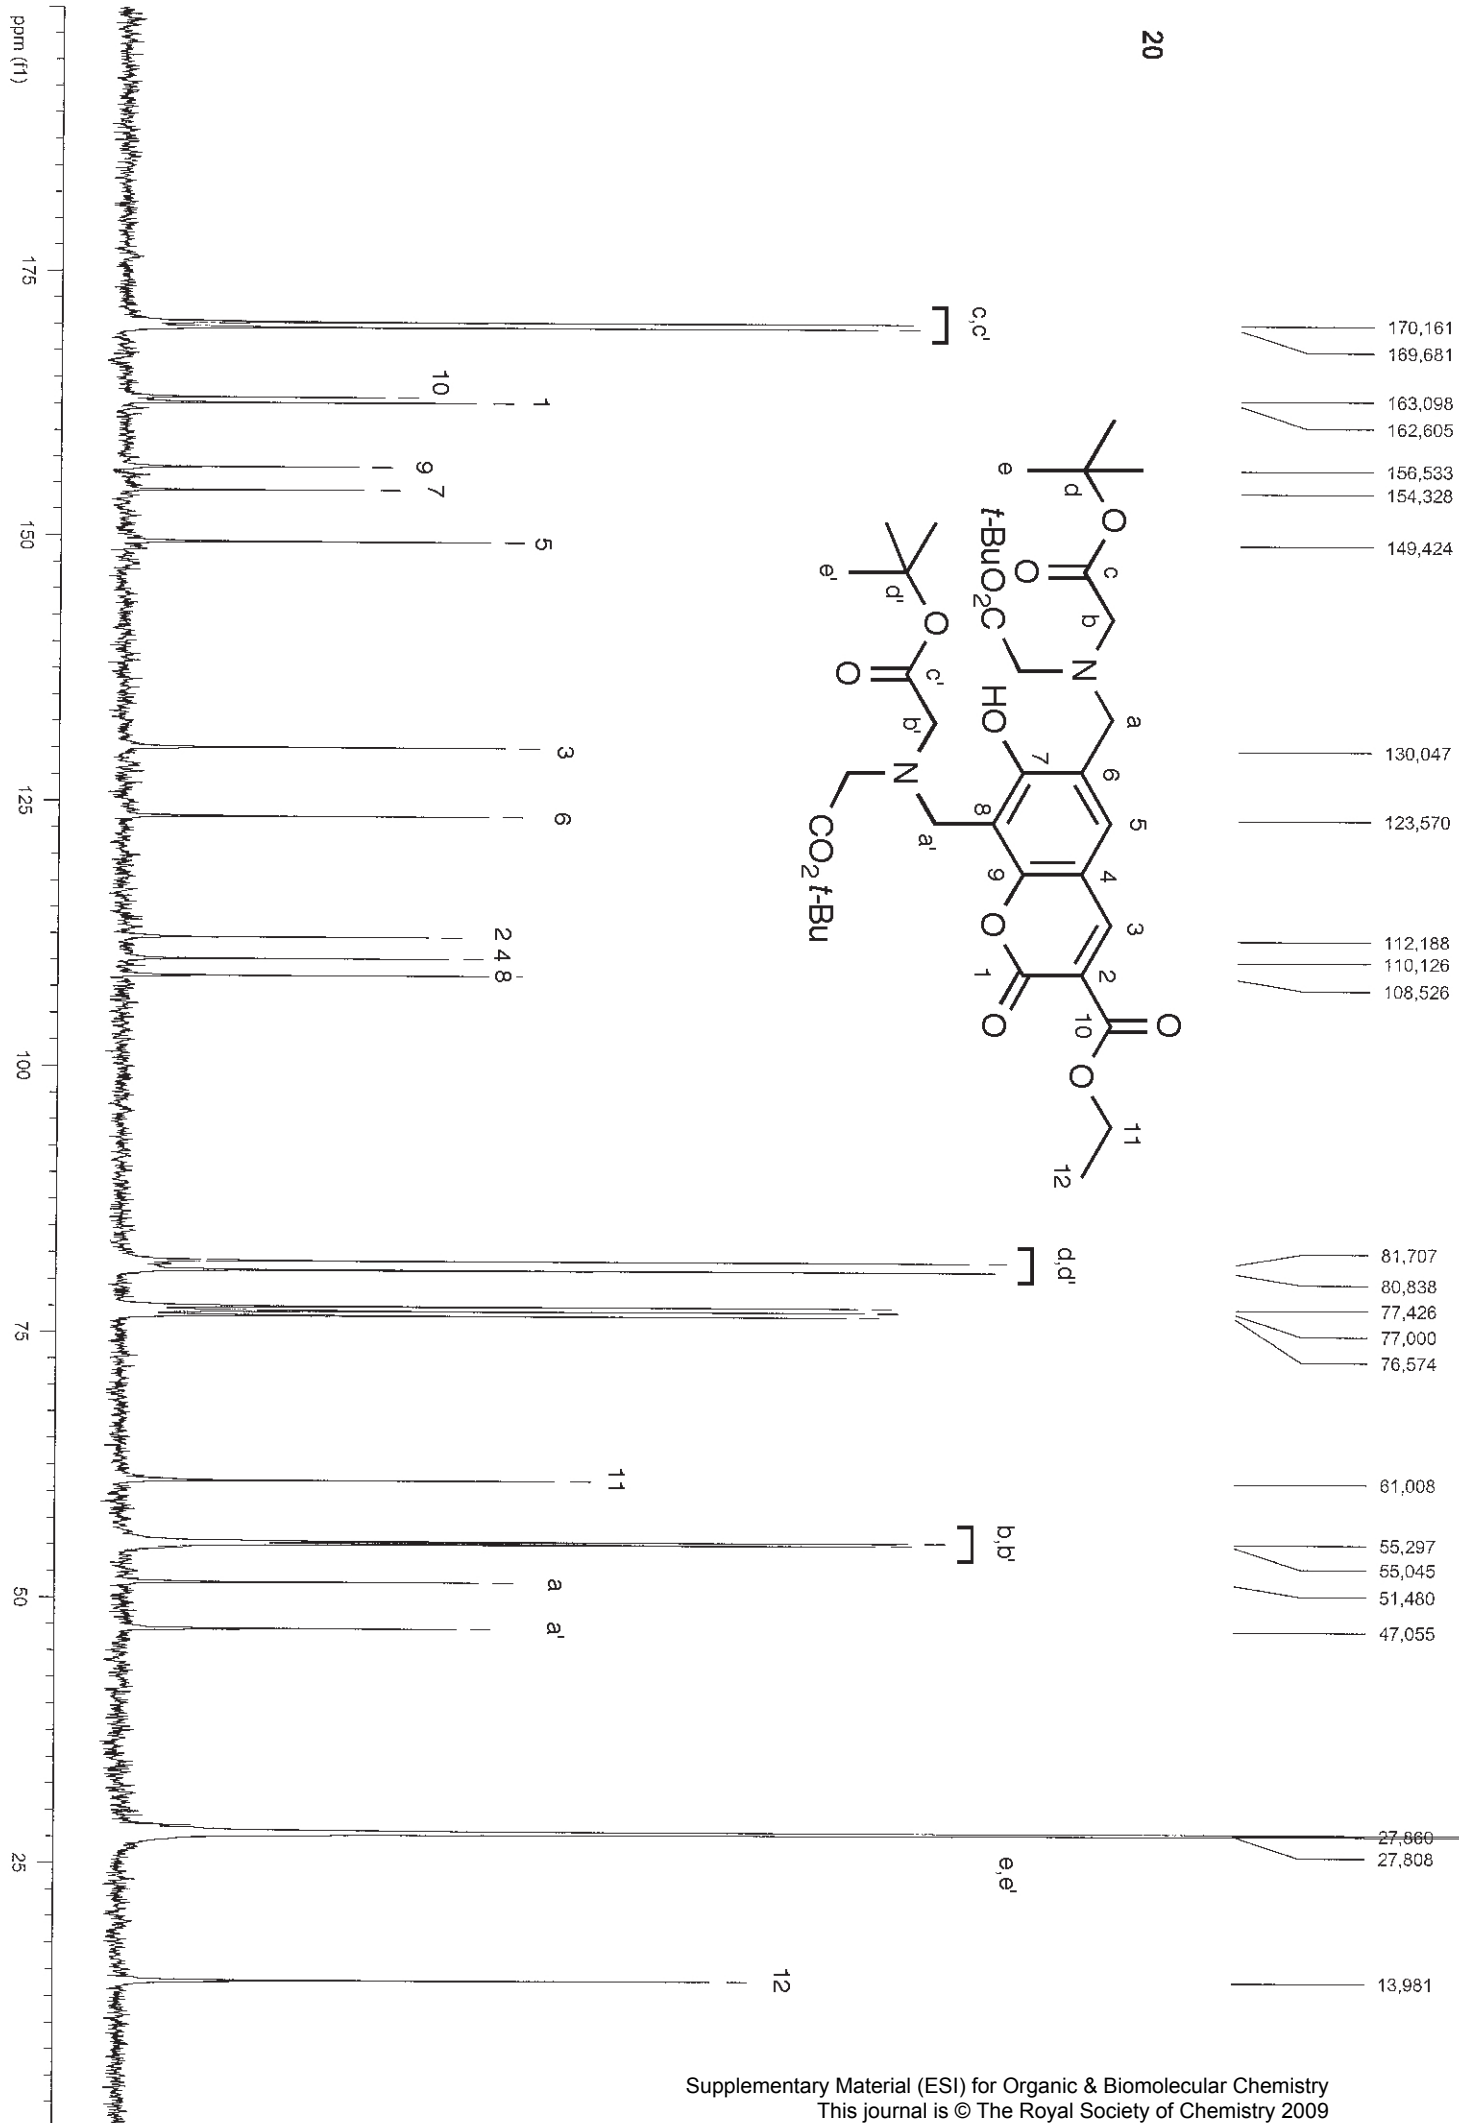

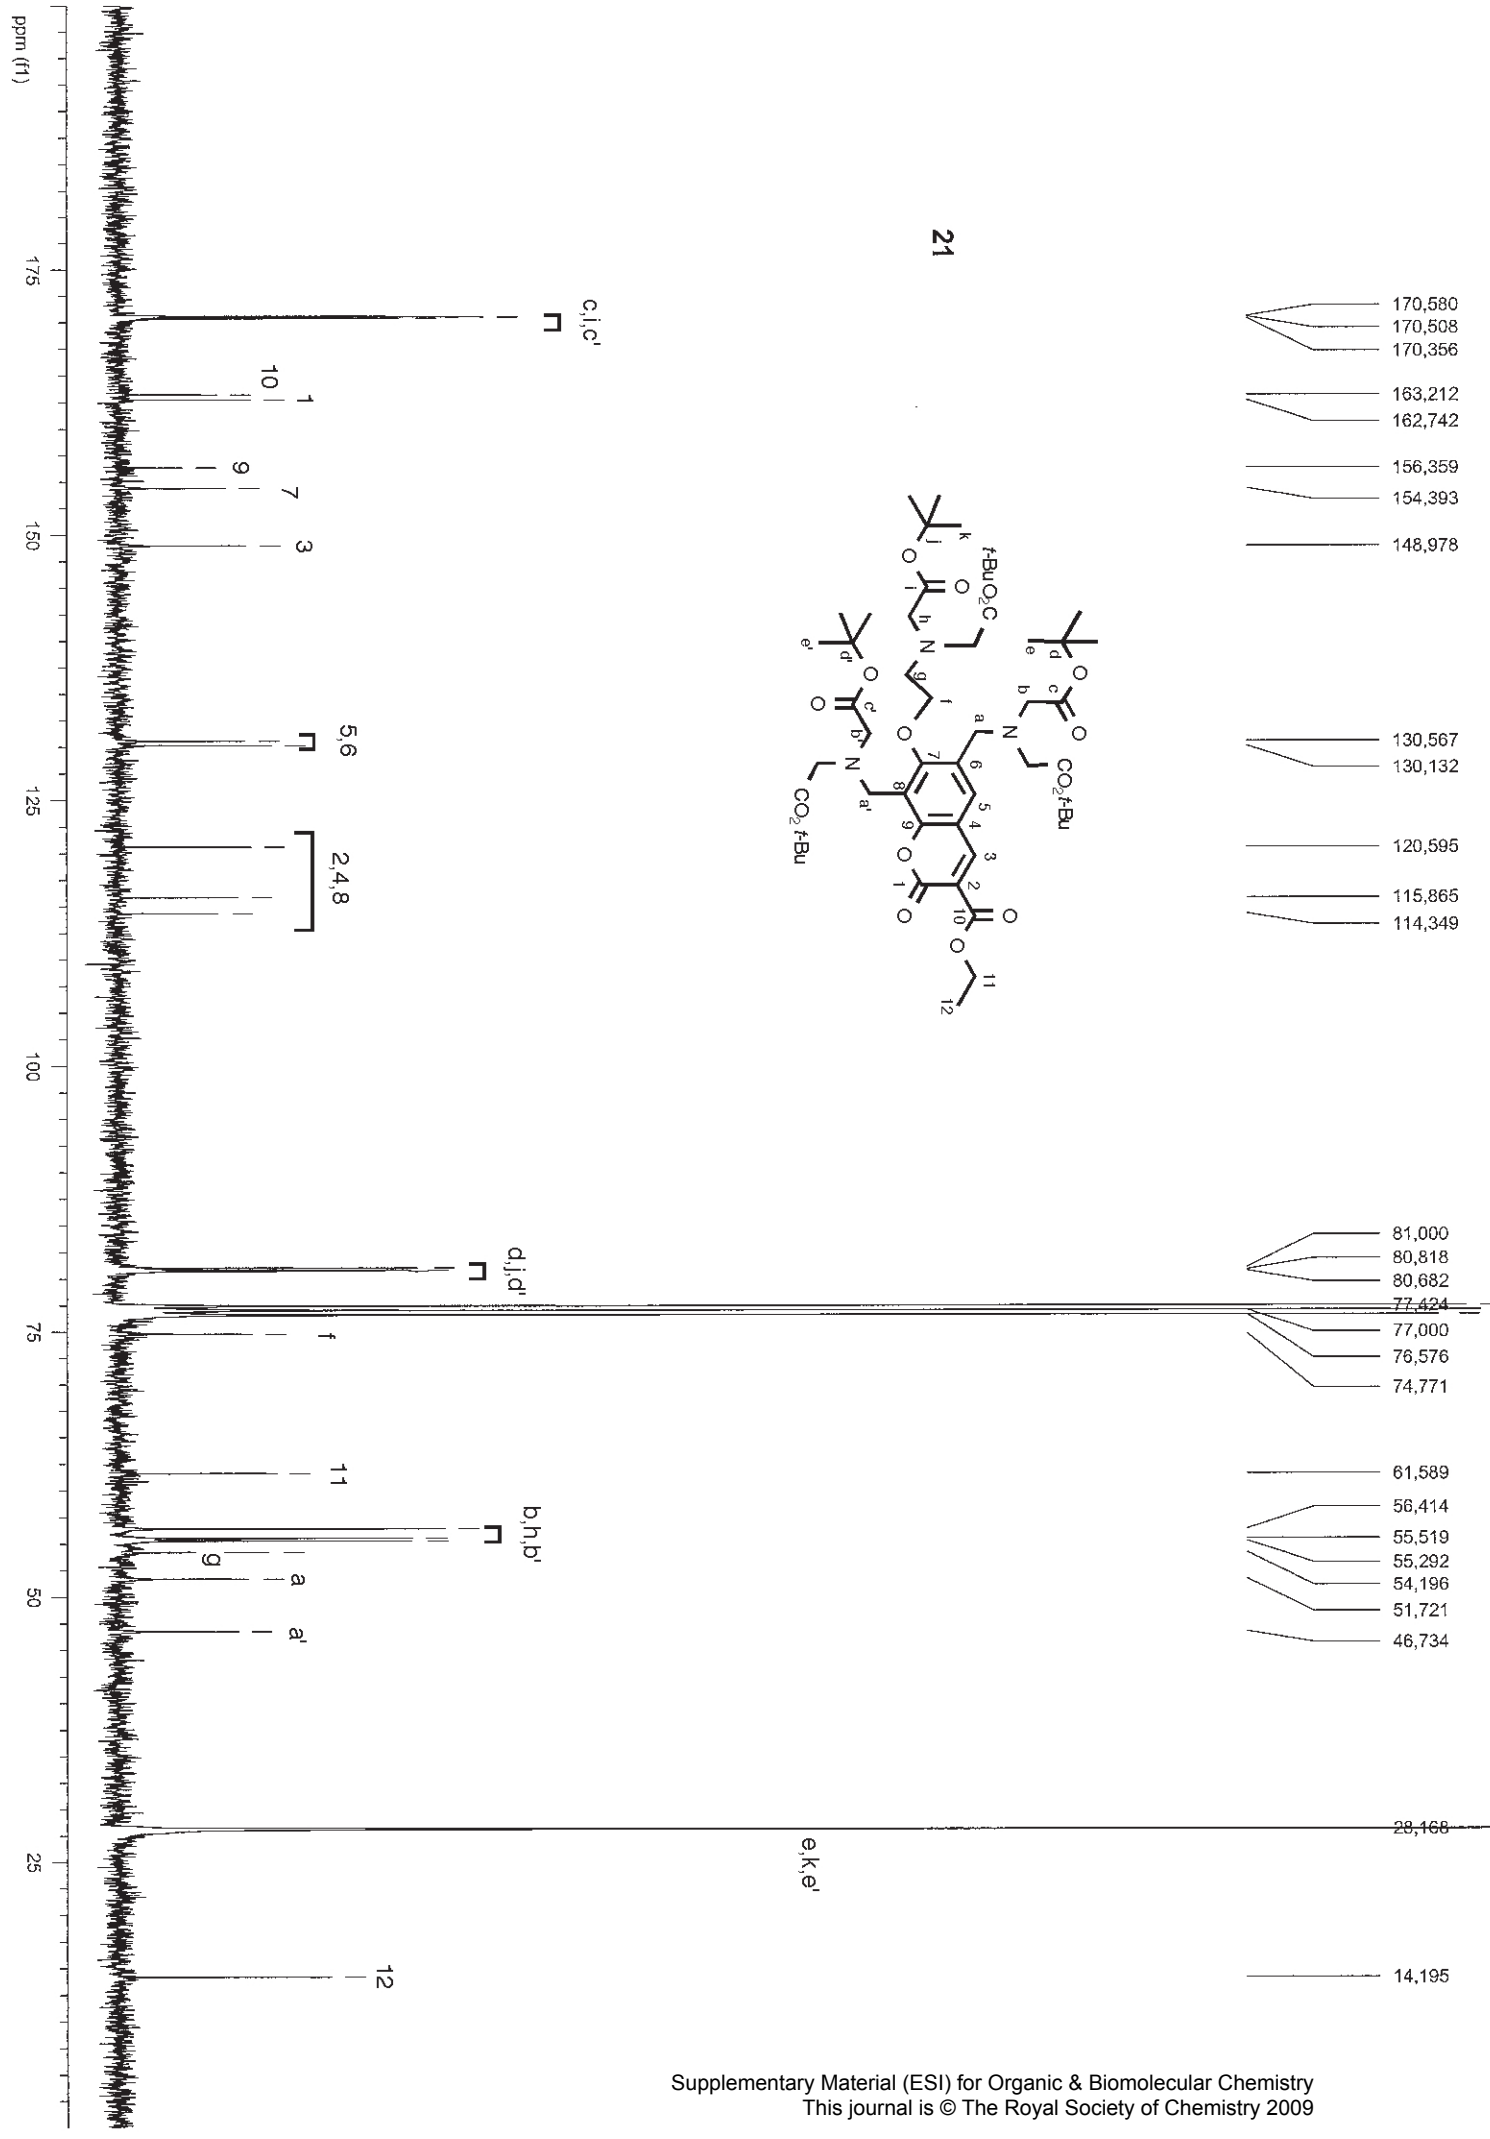

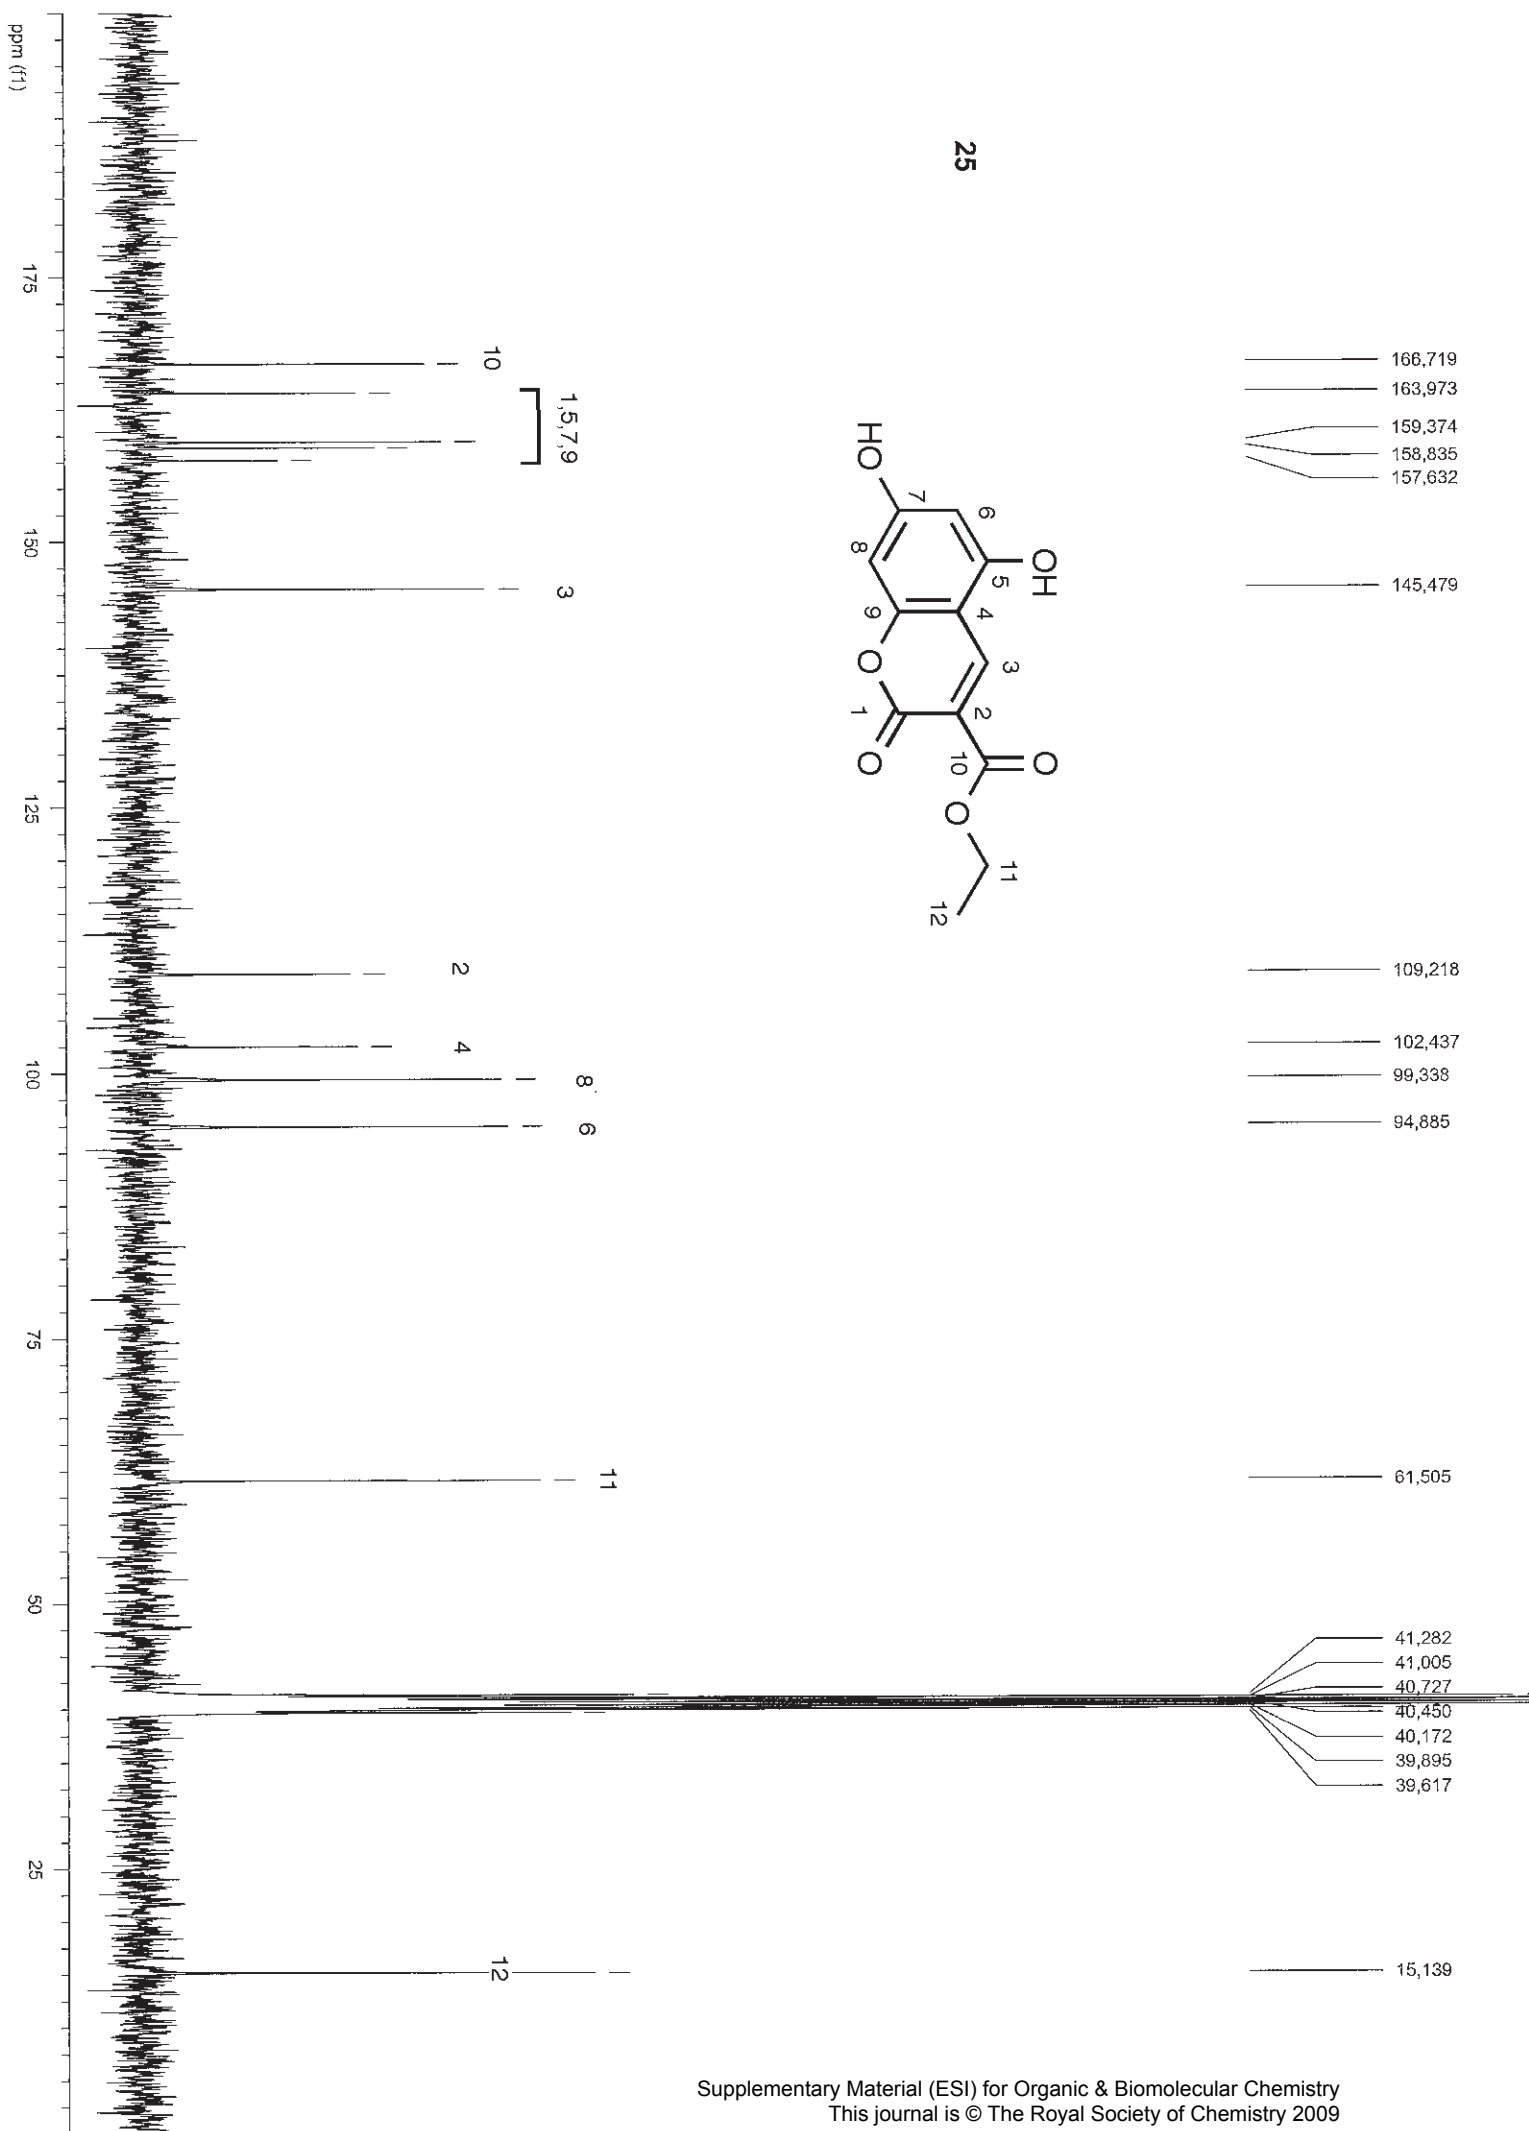

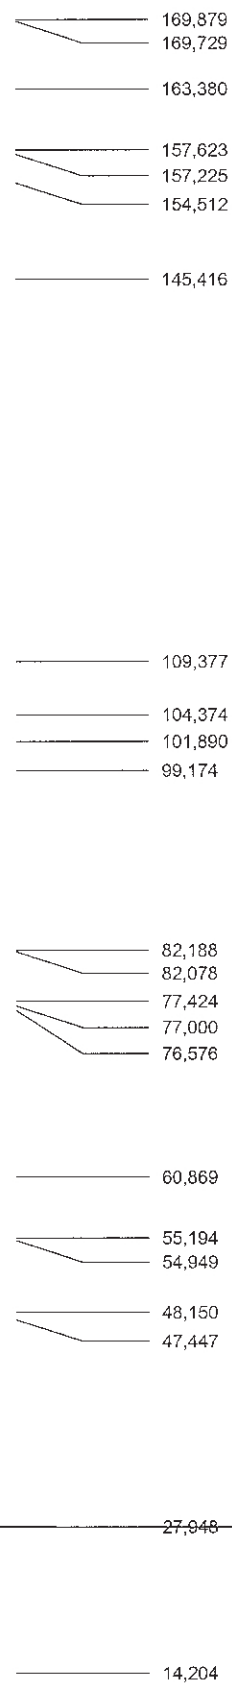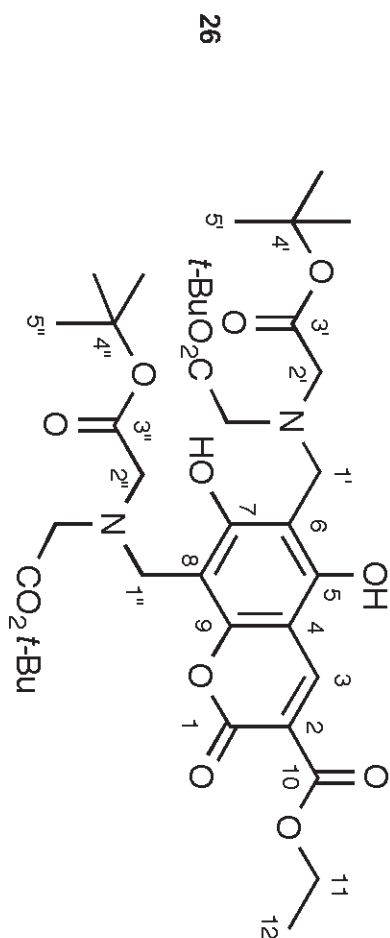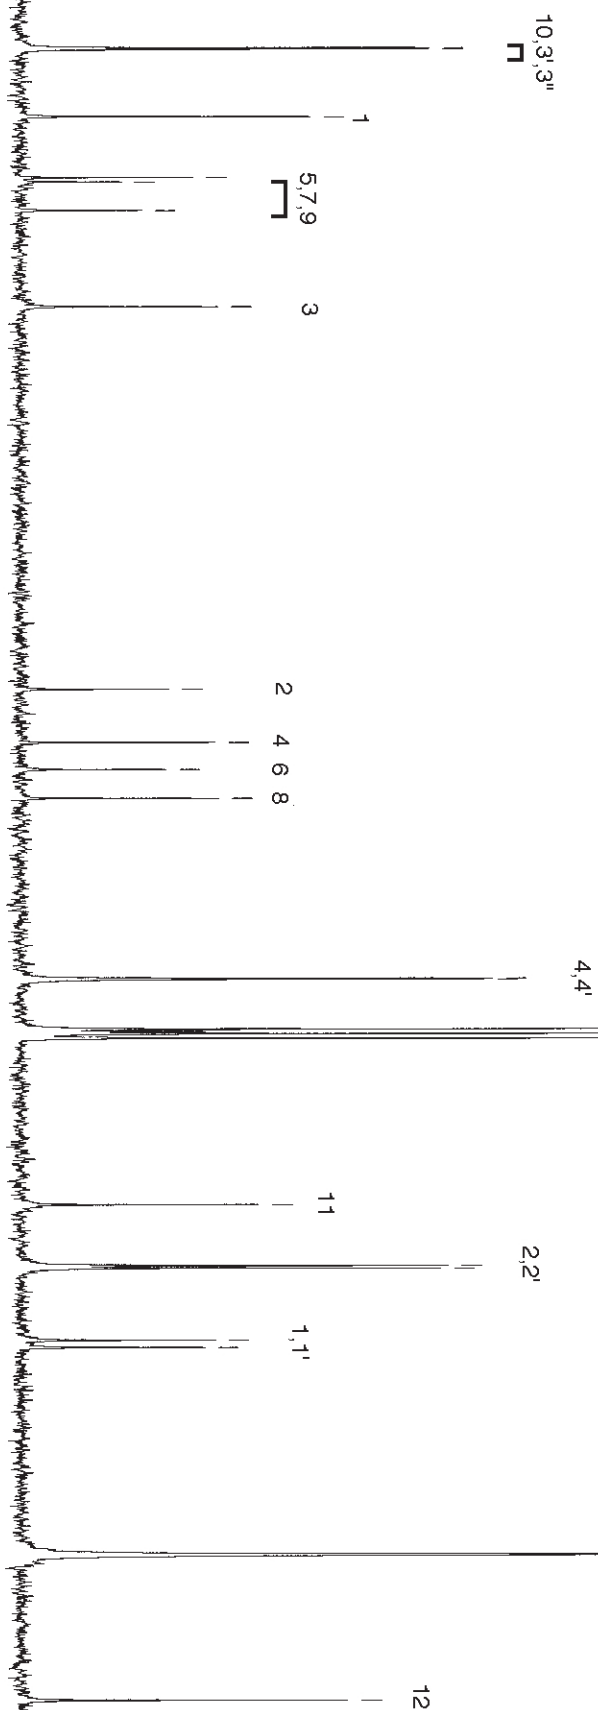

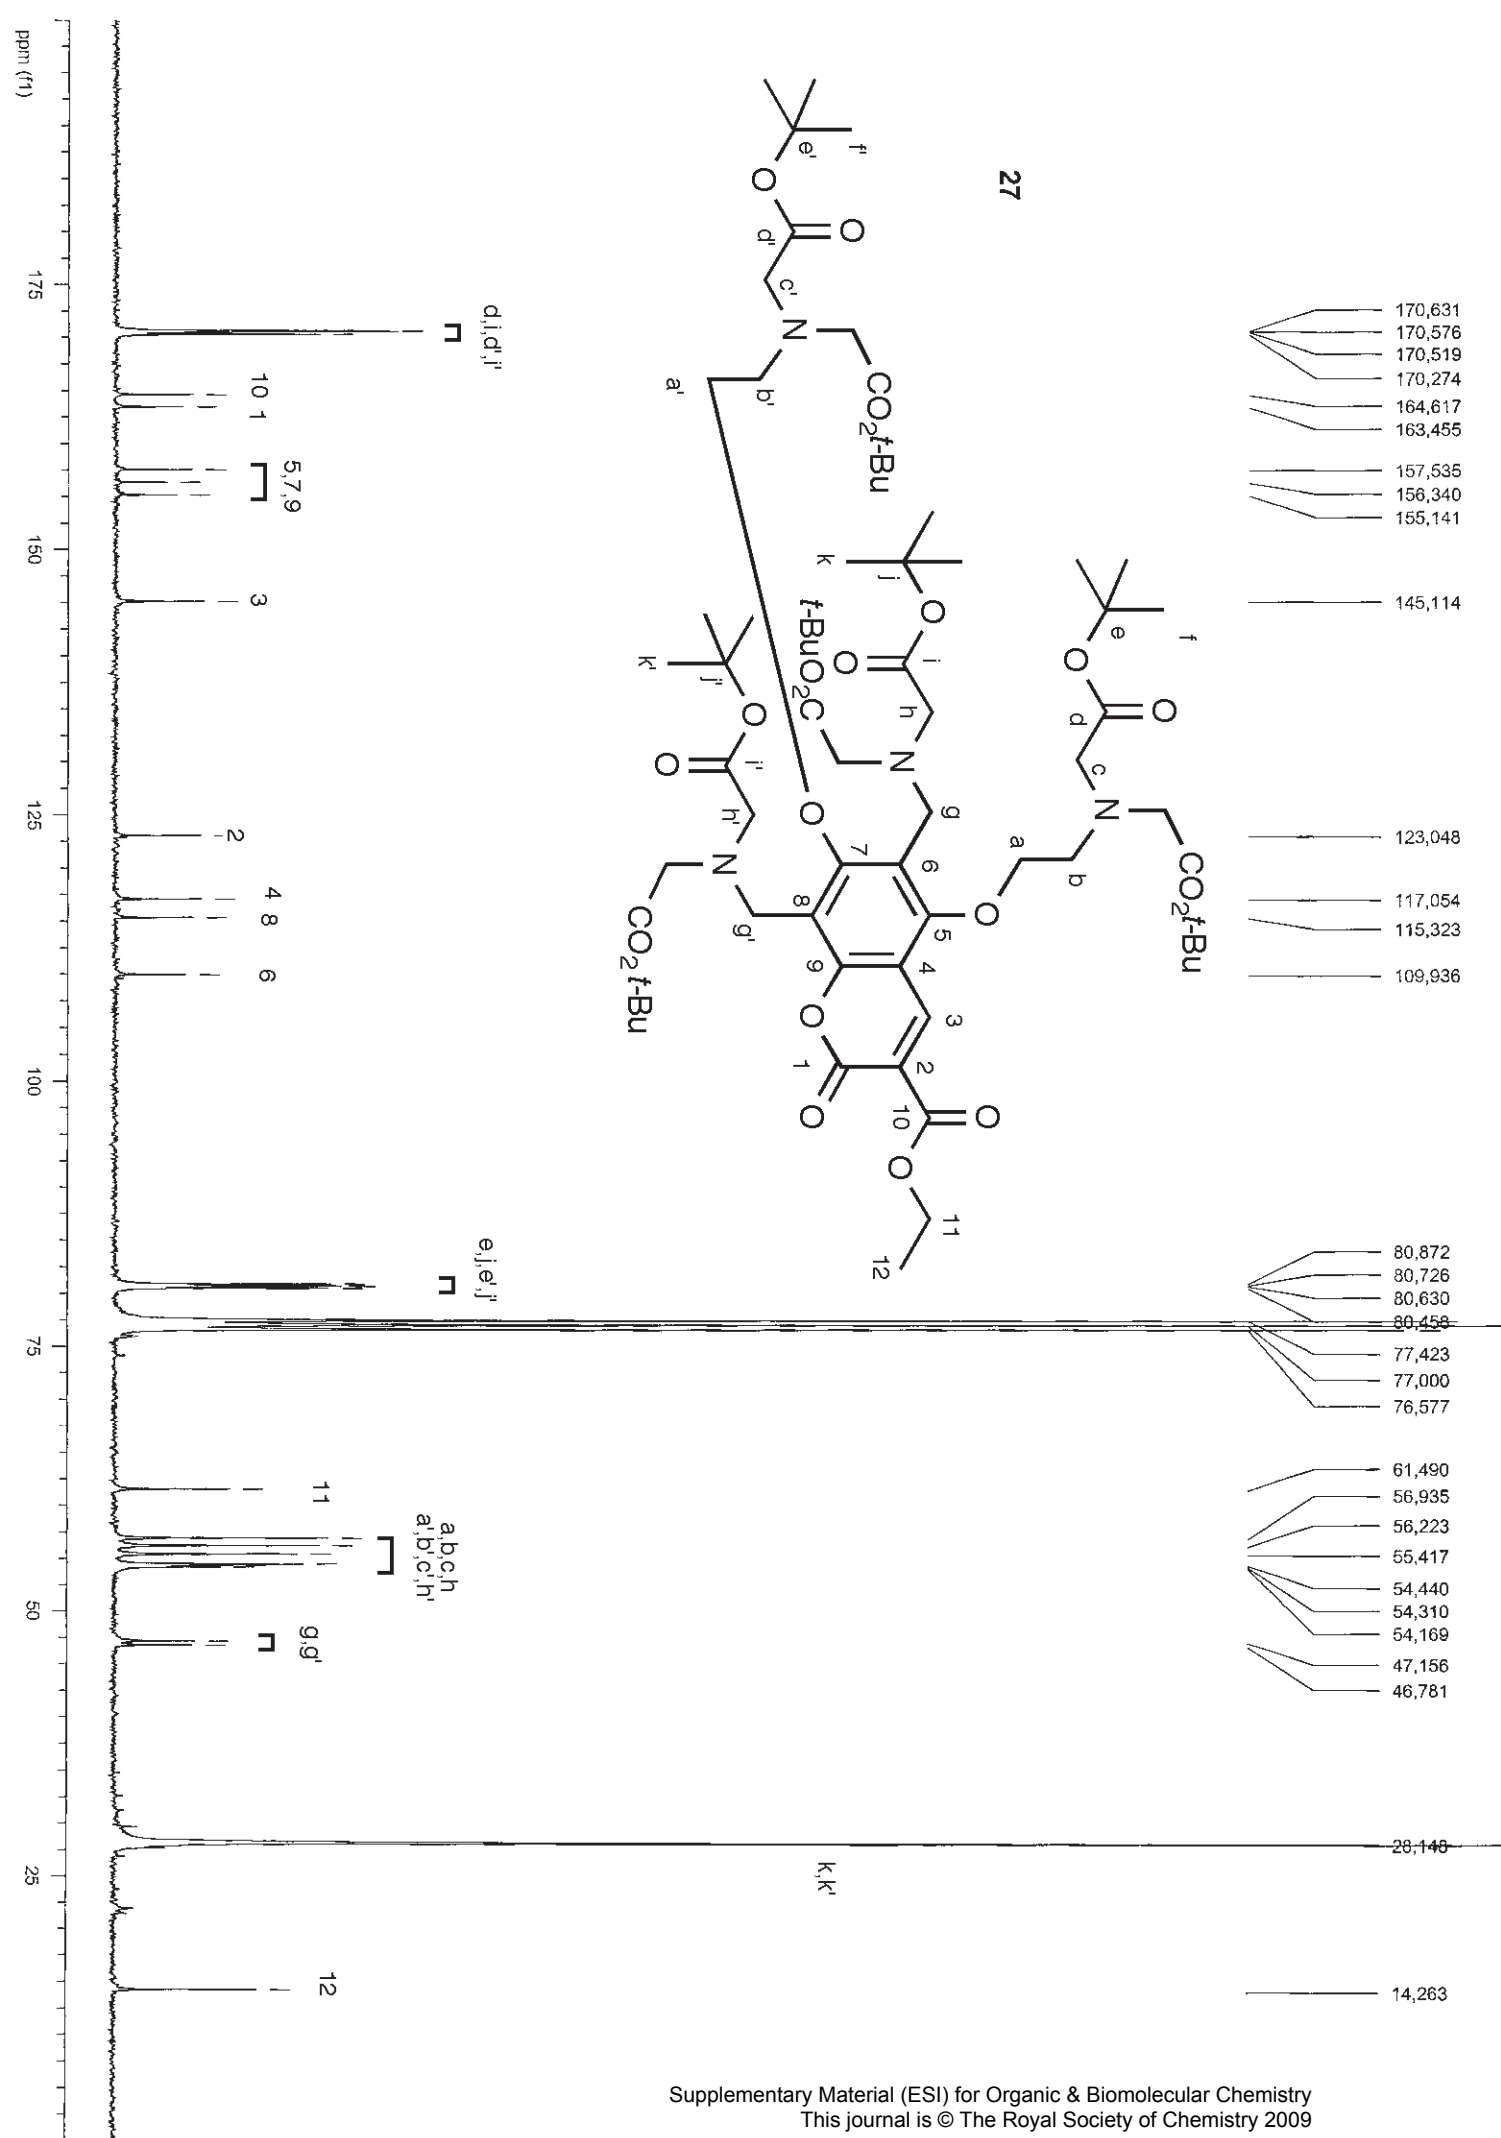





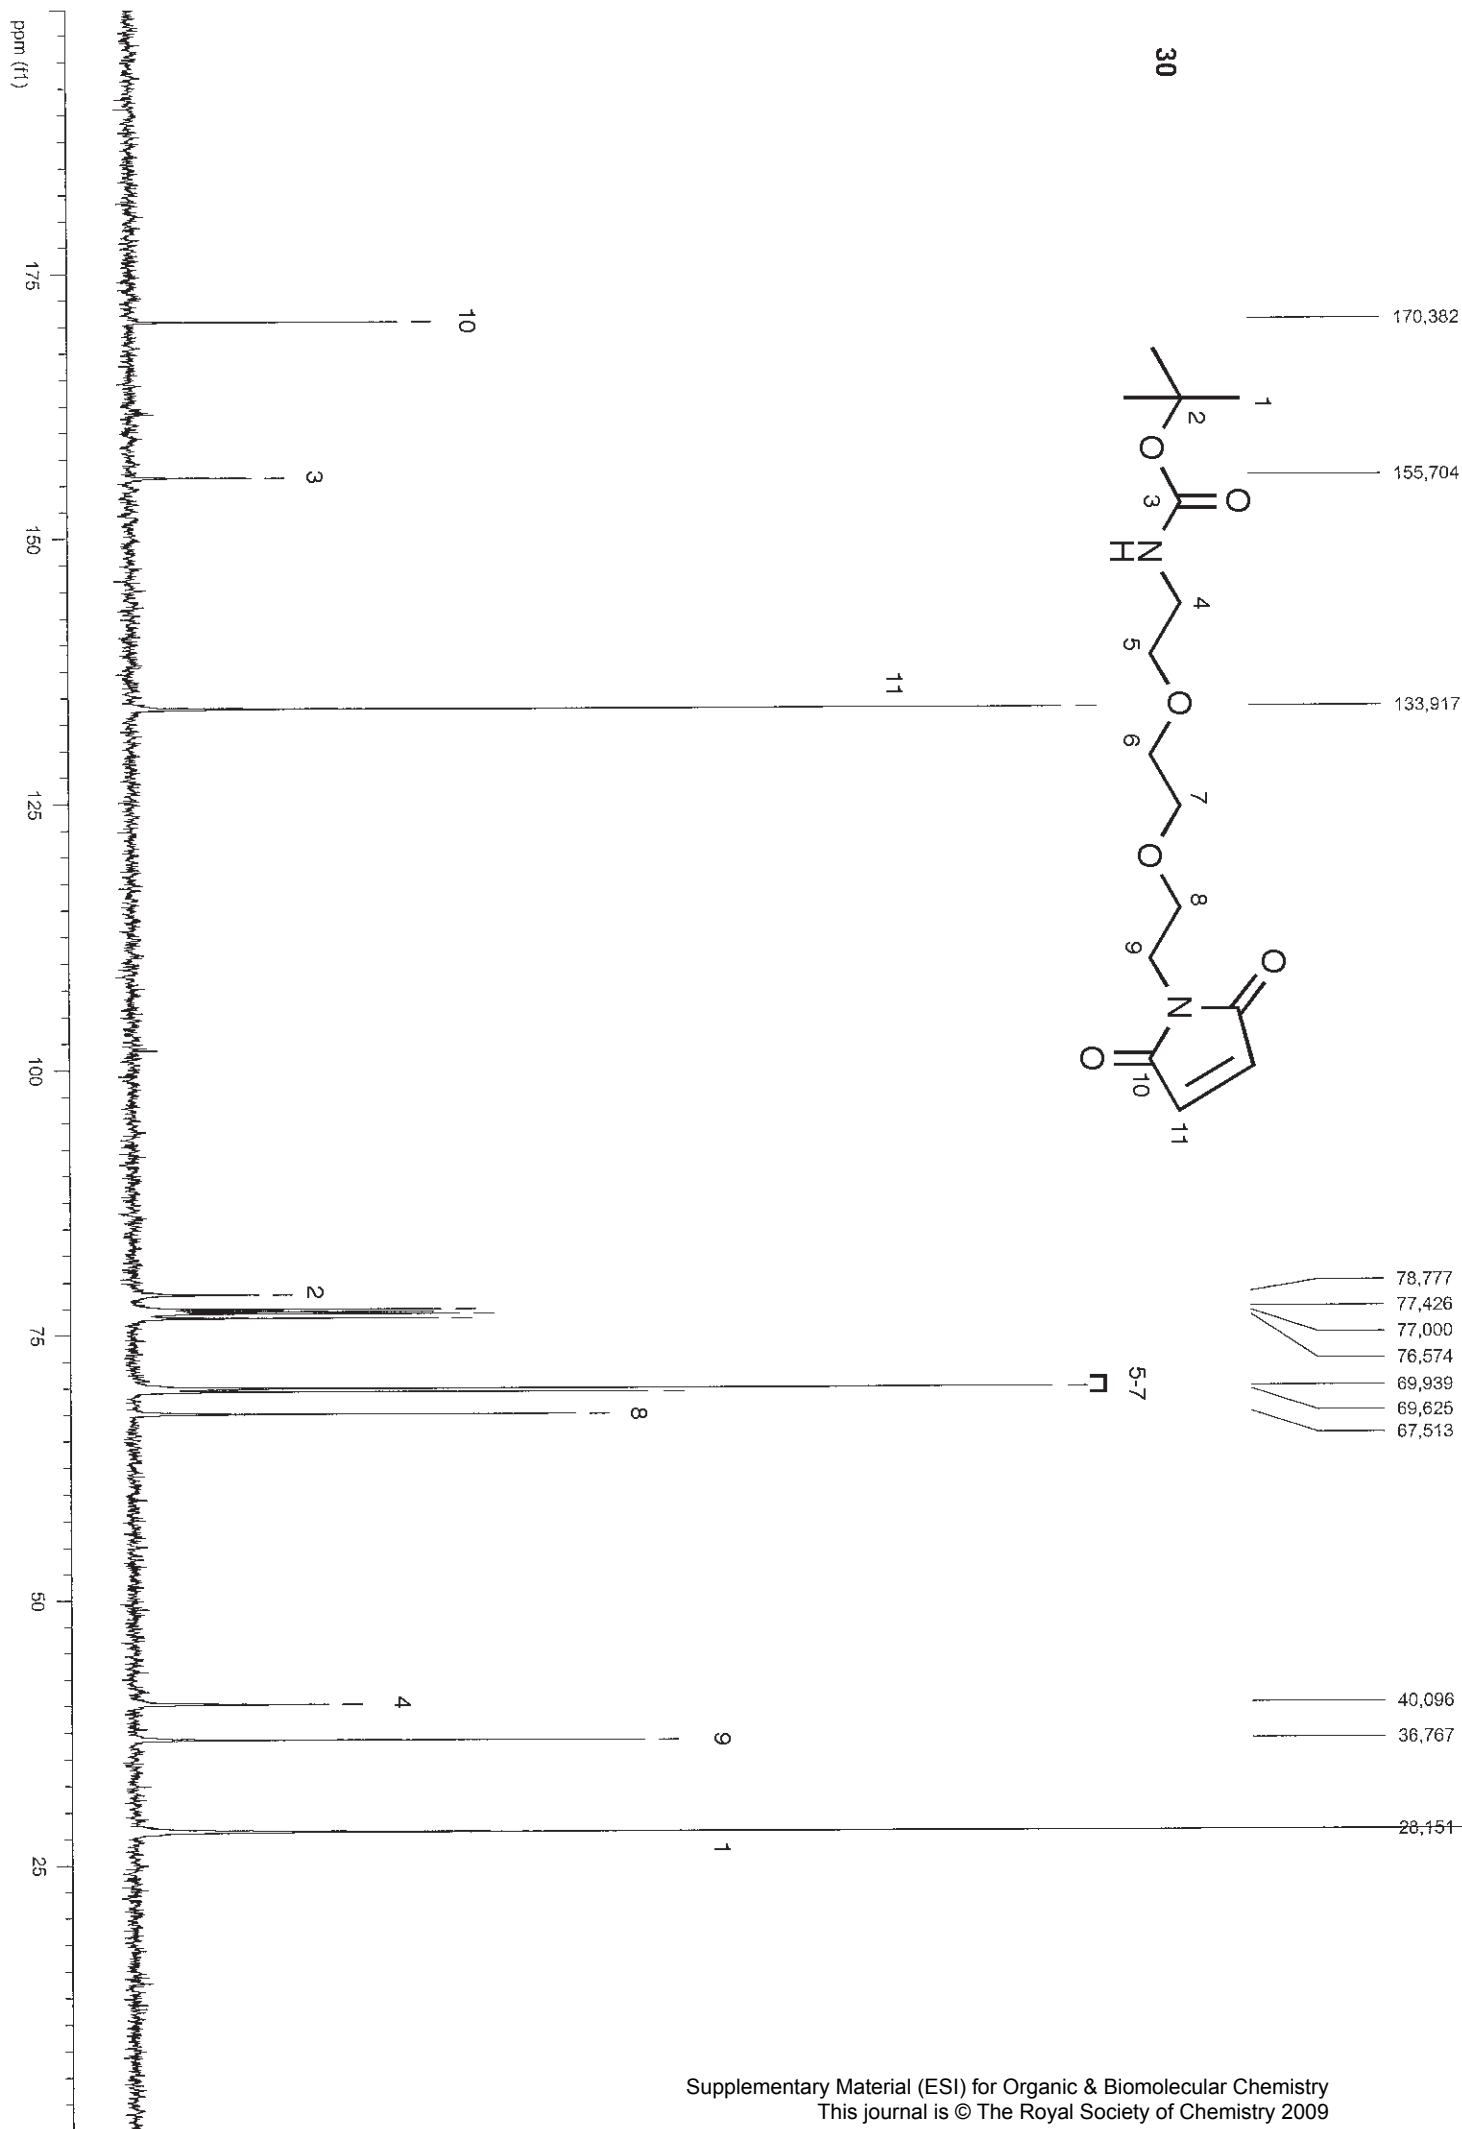

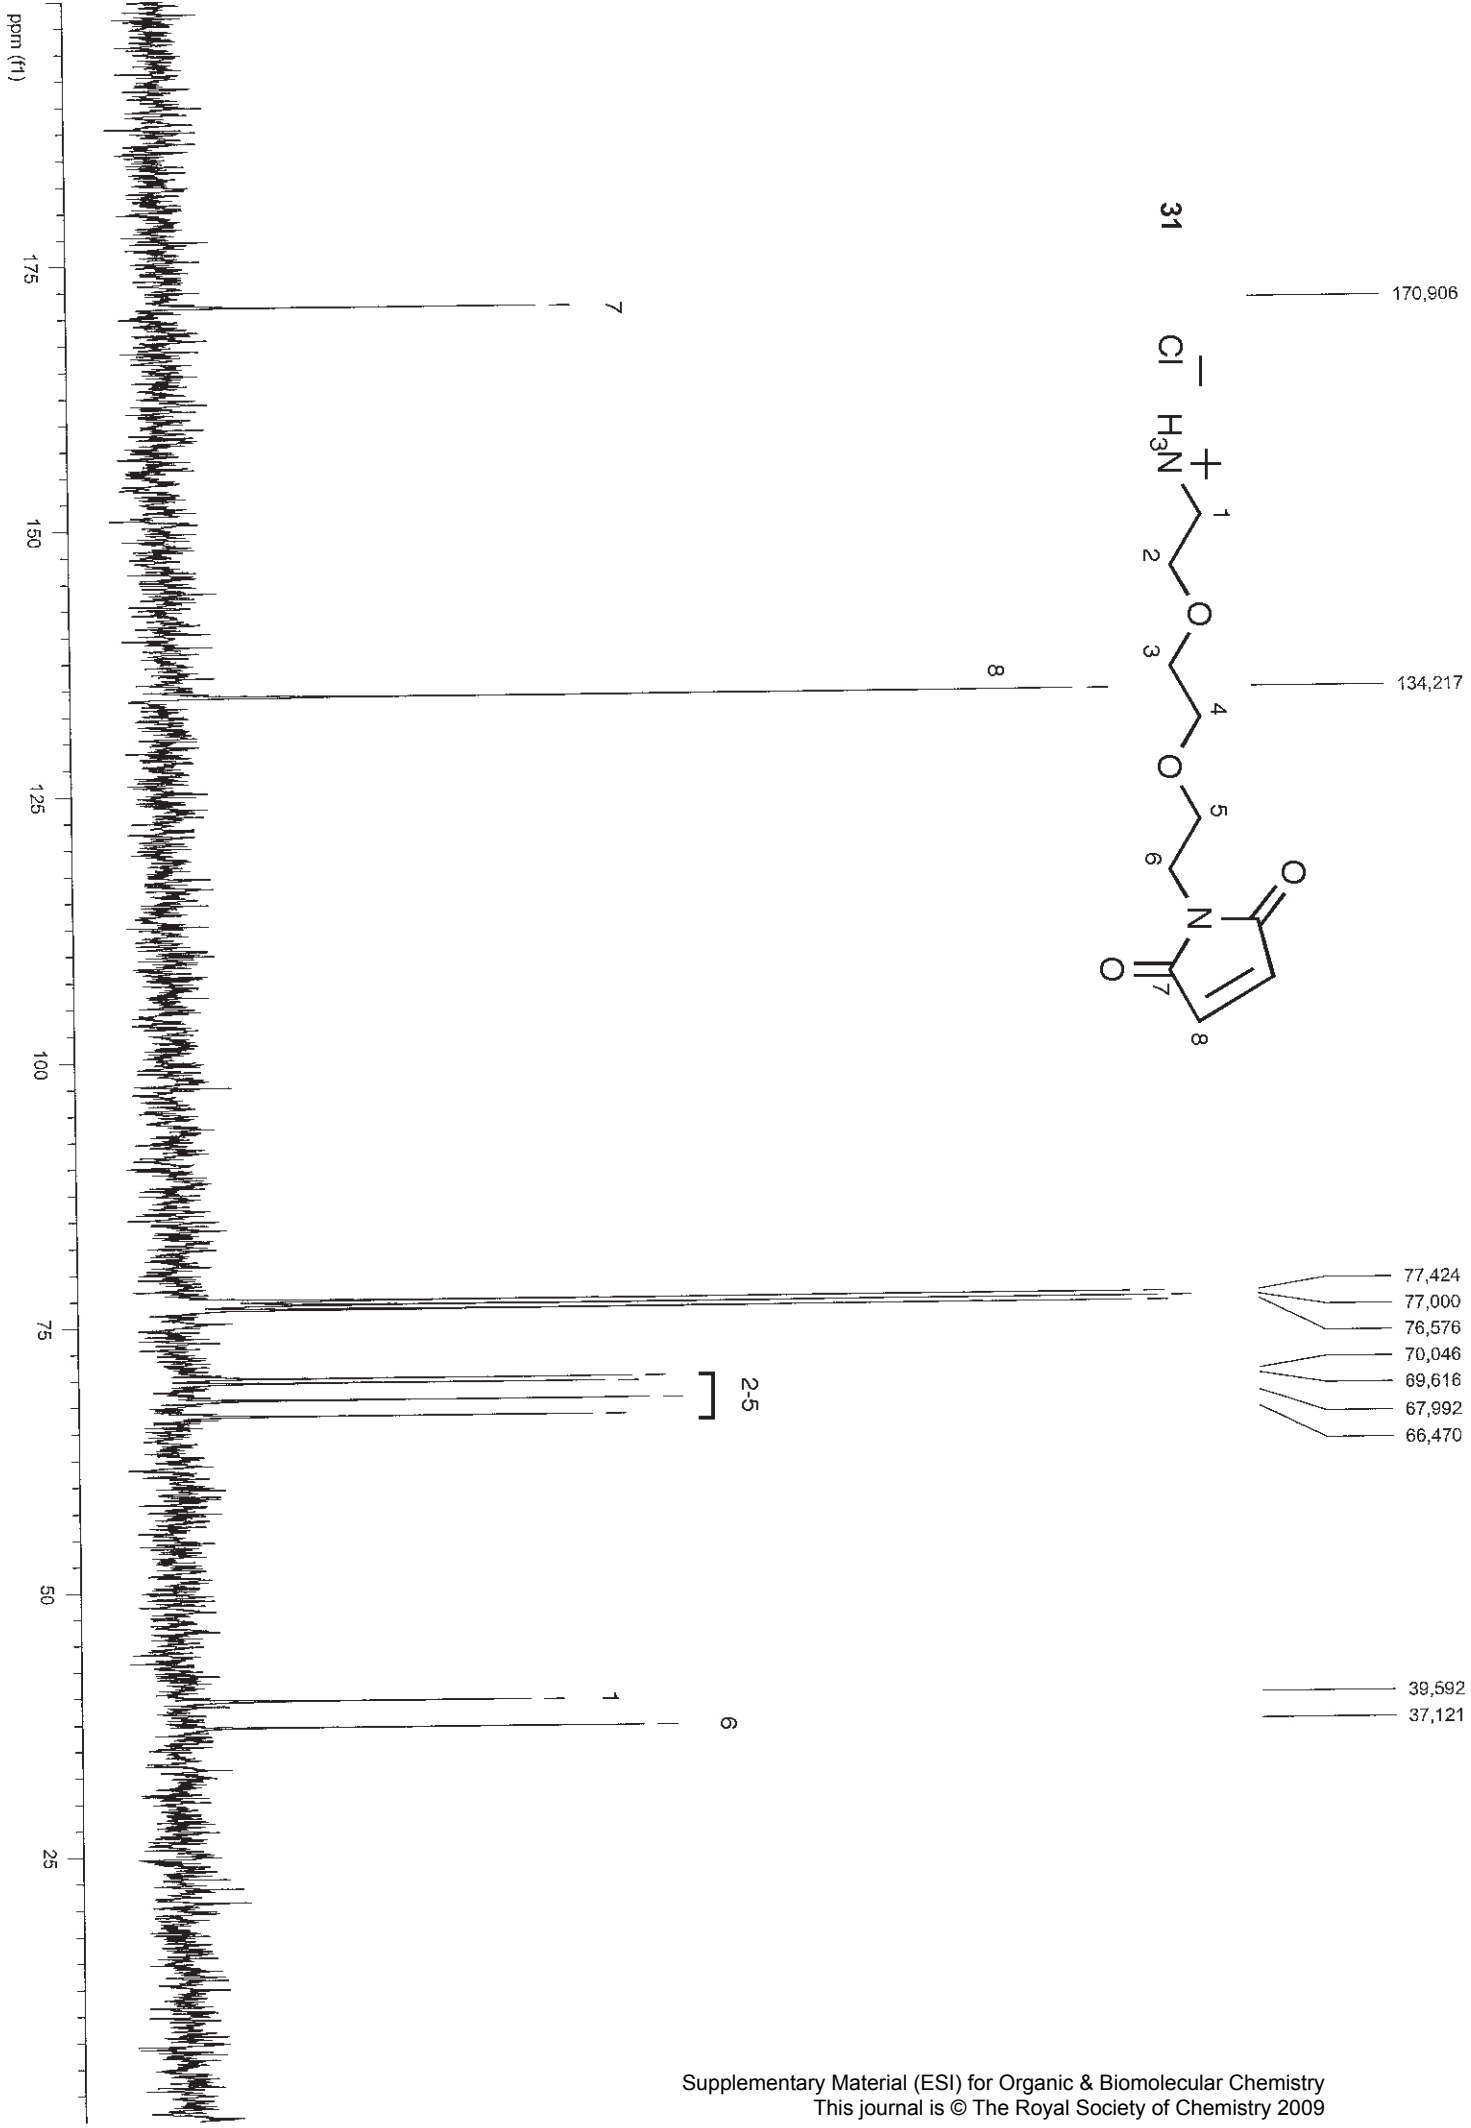

[Eu(**7a**)] luminescence spectrum

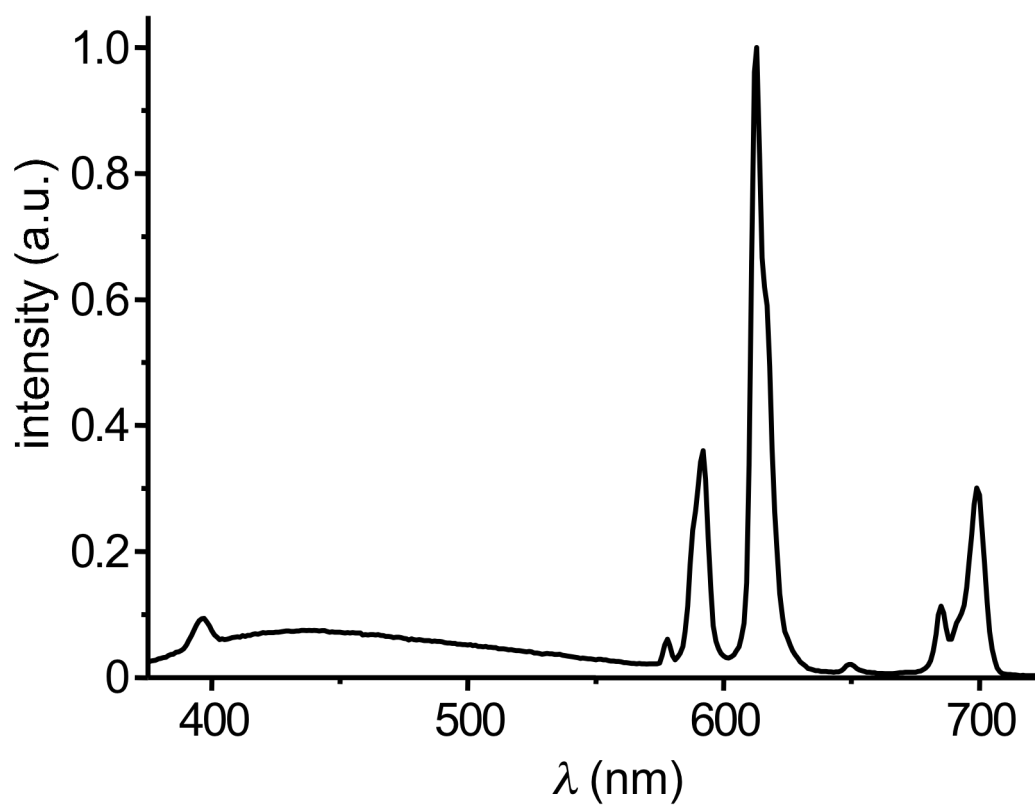

Supplement: b907579h.pdf [file b907579h.pdf]
